# Supplementary material for: Observational and genetic evidence on the association of sleep behaviors with the incidence of fracture
Source: Research Square preprint supplement (doi:10.21203/rs.3.rs-446335/v1), 2021-04-30
Supplement: Supplementary file 1 [file ece83fb4ffa701805bb0b516.docx]

Supplementary Materials

**Supplementary Method**

**Supplementary Tables:**

**Supplementary Table 1** Detailed information on the field ID and codes for participants excluded from the sample quality control.

**Supplementary Table 2** Detailed information on the genome-wide association studies for four sleep behaviors (chronotype, insomnia, snoring, and sleep duration) and summary statistics of fracture, falls, and bone mineral density.

**Supplementary Table 3** Characteristics of the associations of instrumental variables for four sleep behaviors (i.e., chronotype, insomnia, snoring, and sleep duration) with fracture risk. NA means the information on this SNP and its proxy were not available in the summary statistic for fracture. Abbreviations: Chr, chromosome; EAF, effective allele frequency; SNP, single nucleotide polymorphism.

**Supplementary Table 4** Detailed information on self-reported codes for five sleep behaviors (chronotype, insomnia, snoring, sleep duration, and excessive daytime sleepiness), the ICD-9 and ICD-10 codes for non-secondary fracture, and the codes for the corresponding diagnosis time in the UK Biobank. Abbreviations: ICD-9, the International Classification of Diseases, 9th Revision; ICD-10, the International Classification of Diseases, 10th Revision.

**Supplementary Table 5** Detailed information on the definition and self-reported UK Biobank field codes for covariates adjusted in observational studies.

**Supplementary Table 6** Baseline characteristics of participants who had and had not developed a fracture in prospective fracture studies. *Values are numbers (percentages); #Values are mean (standard deviation); Abbreviations: N, number.

**Supplementary Table 7** Assessment of the mediator (i.e., falls) for the association between insomnia and fracture risk. *This mediation analysis was adjusted for age, education, sex, smoking, alcohol consumption, physical activity, body mass index, and glucocorticoid use. Abbreviations: ACME, average causal mediation effect; ADE, average direct effect; CI, confidence interval.

**Supplementary Table 8** Assessment of the mediator (i.e., bone mineral density) for the association between insomnia and fracture risk. *This mediation analysis was adjusted for age, education, sex, smoking, alcohol consumption, physical activity, body mass index, and glucocorticoid use. Abbreviations: ACME, average causal mediation effect; ADE, average direct effect; CI, confidence interval.

**Supplementary Table 9** Assessment of the mediator (i.e., falls) for the association between sleep duration and fracture risk. *This mediation analysis was adjusted for age, education, sex, smoking, alcohol consumption, physical activity, body mass index, and glucocorticoid use. Abbreviations: ACME, average causal mediation effect; ADE, average direct effect; CI, confidence interval.

**Supplementary Table 10** Assessment of the mediator (i.e., bone mineral density) for the association between sleep duration and fracture risk. *This mediation analysis was adjusted for age, education, sex, smoking, alcohol consumption, physical activity, body mass index, and glucocorticoid use. Abbreviations: ACME, average causal mediation effect; ADE, average direct effect; CI, confidence interval.

**Supplementary Table 11** Association of sleep duration with fracture risk in male and female in observational analyses. Model 1 was adjusted for confounders, including age, education, sex, smoking, alcohol consumption, physical activity, body mass index, and the use of glucocorticoid; Model 1 = Model 0 + BMD; Model 2 = Model 0 +falls; Model 3 = Model 0+ BMD + falls. * the *P*-value of the intercept term. Abbreviations: BMD, bone mineral density; CI, confidence interval; HR, hazard ratio; IVW, inverse-variance weighted; MR, Mendelian randomization; MR-PRESSO, MR pleiotropy residual sum and outlier; OR, odds ratio.

**Supplementary Table 12** Association of snoring with fracture risk in observational and Mendelian randomization analyses. Model 1 was adjusted for confounders, including age, education, sex, smoking, alcohol consumption, physical activity, body mass index, and glucocorticoid use; Model 1 = Model 0 + BMD; Model 2 = Model 0 +falls; Model 3 = Model 0+ BMD + falls. * the *P*-value of the intercept term. Abbreviations: BMD, bone mineral density; CI, confidence interval; HR, hazard ratio; IVW, inverse-variance weighted; MR, Mendelian randomization; MR-PRESSO, MR pleiotropy residual sum and outlier; OR, odds ratio.

**Supplementary Table 13** Baseline characteristics of participants with snoring and non-snoring. a values are mean (SD); b values are numbers (percentages).

**Supplementary Table 14** Association of chronotype and daytime sleepiness with fracture risk in observational and Mendelian randomization analyses. Model 1 was adjusted for confounders, including age, education, sex, smoking, alcohol consumption, physical activity, body mass index, and glucocorticoid use; Model 1 = Model 0 + BMD; Model 2 = Model 0 +falls; Model 3 = Model 0+ BMD + falls. * the *P*-value of the intercept term. Abbreviations: BMD, bone mineral density; CI, confidence interval; HR, hazard ratio; IVW, inverse-variance weighted; MR, Mendelian randomization; MR-PRESSO, MR pleiotropy residual sum and outlier; OR, odds ratio.

**Supplementary Table 15** Assessment of the mediator (i.e., falls) for the association between sleep risk score and fracture risk. *This mediation analysis was adjusted for age, education, sex, smoking, alcohol consumption, physical activity, body mass index, and glucocorticoid use. Abbreviations: ACME, average causal mediation effect; ADE, average direct effect; CI, confidence interval.

**Supplementary Table 16** Assessment of the mediator (i.e., bone mineral density) for the association between sleep risk score and fracture risk. *This mediation analysis was adjusted for age, education, sex, smoking, alcohol consumption, physical activity, body mass index, and glucocorticoid use. Abbreviations: ACME, average causal mediation effect; ADE, average direct effect; CI, confidence interval.

**Supplementary Figure:**

**Supplementary Figure 1** An overview of the study design. Abbreviations: IVW, inverse-variance weighted; MR, Mendelian randomization; MR-PRESSO, MR pleiotropy residual sum and outlier; wGRS, weighted genetic risk score.

**Supplementary Figure 2** Observational association of sleep duration with fracture risk using a restricted cubic spline based on model 0 based on different cut points: (A) sleeping 5 hours per day; (B) sleeping 6 hours per day; (C) sleeping 9 hours per day; and (D) sleeping 10 hours per day. Hazard ratios are indicated by solid lines and the 95% confidence intervals by shaded areas. In all these analyses, models were adjusted for risk factors for fracture, including age, education, sex, smoking, alcohol consumption, physical activity, body mass index, and the use of glucocorticoid.

**Supplementary Method**

**Detail information on UK Biobank**

Information on more than 2,000 traits, including sleep behaviors, fractures, and relevant confounding factors, were recorded through questionnaires and physical measurements. Participants were genotyped with UK Biobank Axiom Array, and genotype imputation was performed using the 1000 Genomes Project (Phase 3) reference panel.[1](#_ENREF_1) Ethics approval for the UK Biobank research was obtained from the North West Multicentre Research Ethical Committee, and all participants provided informed consent.

**Assessment of sleep** **behaviors**

Insomnia symptoms were assessed in the question, “Do you have trouble falling asleep at night or do you wake up in the middle of the night?” with the three possible answers being “never/rarely”, “sometimes”, or “usually” or “prefer not to answer”, which we coded as 0, 1, and 2, respectively. Sleep duration was coded based on the number of reported hours using the following question: “About how many hours of sleep do you get in every 24 h? (including naps)”. Information on snoring was obtained by asking, “Does your partner or a close relative or friend complain about your snoring?” with responses being either “no” or “yes”. We derived a binary variable for snoring where “no self-reported snoring” and “having self-reported snoring” were coded as 0 and 1, respectively. To assess subjective daytime sleepiness, participants were asked, “How likely are you to doze off or fall asleep during the daytime when you don’t mean to? (e.g., when working, reading, or driving)” with responses being “never/rarely”, “sometimes”, “often”, or “all the time”. We derived an ordinal variable for subjective daytime sleepiness where “never/rarely”, “sometimes”, “often”, and “all the time” were coded as 0, 1, 2, and 3, respectively. For those five questions, participants who responded “Prefer not to answer” or “Do not know” were set to missing. Information on chronotype preference was collected by asking, “Do you consider yourself to be (i) definitely a ‘morning’ person, (ii) more of a ‘morning’ than an ‘evening’ person, (iii) more of an ‘evening’ than a ‘morning’ person, (iv) definitely an ‘evening’ person, (v) do not know, or (vi) prefer not to answer”? We derived a four-level ordinal variable for chronotype preference where “an ‘evening’ person”, “more of an ‘evening’ than a ‘morning’ person”, “more of a ‘morning’ than an ‘evening’ person”, and “a ‘morning’ person” were coded as 0, 1, 2, 3, respectively.

**The selection of instrumental variables**

Single nucleotide polymorphisms (SNPs) associated with respective sleep behavior (chronotype,[2](#_ENREF_2) insomnia,[3](#_ENREF_3) sleep duration,[4](#_ENREF_4) or snoring[5](#_ENREF_5)) at a genome-wide significant (*P* < 5×10-8) level were selected from the largest genome-wide association studies (*n* = 697,828 for chronotype; *n* = 1,331,010 for insomnia; *n* = 446,118 for sleep duration; *n* = 408,317 for snoring) (**Supplementary Table 2**). To reduce the influence of linkage disequilibrium (LD) on MR estimates,[6](#_ENREF_6) we extracted SNPs with the lowest *P*-value for the associated trait after clumping for LD at r2 < 0.01 in 250kb regions. As a result, 268 SNPs were retained as instrumental variables for chronotype, 184 SNPs for insomnia, 72 SNPs for sleep duration, and 30 SNPs for snoring (**Supplementary Table 3**).

**Multivariable Cox regression models**

In the multivariable Cox regression, the basic model was adjusted for confounders, including age, sex, body mass index, education, smoking, alcohol consumption, physical activity, and the use of glucocorticoid medication (model 0), additional covariables such as BMD and falls were also included to set different models (mode11=model 0+BMD, model 2=model0+falls, and model 3=model 0+BMD+falls).

**Reference**

1. Bycroft C, Freeman C, Petkova D, Band G, Elliott LT, Sharp K, Motyer A, Vukcevic D, Delaneau O, O'Connell J, et al. The UK Biobank resource with deep phenotyping and genomic data. *Nature*. 2018;562:203-209.

2. Jones SE, Lane JM, Wood AR, van Hees VT, Tyrrell J, Beaumont RN, Jeffries AR, Dashti HS, Hillsdon M, Ruth KS, et al. Genome-wide association analyses of chronotype in 697,828 individuals provides insights into circadian rhythms. *Nature communications*. 2019;10:343.

3. Jansen PR, Watanabe K, Stringer S, Skene N, Bryois J, Hammerschlag AR, de Leeuw CA, Benjamins JS, Munoz-Manchado AB, Nagel M, et al. Genome-wide analysis of insomnia in 1,331,010 individuals identifies new risk loci and functional pathways. *Nature genetics*. 2019;51:394-403.

4. Dashti HS, Jones SE, Wood AR, Lane JM, van Hees VT, Wang H, Rhodes JA, Song Y, Patel K, Anderson SG, et al. Genome-wide association study identifies genetic loci for self-reported habitual sleep duration supported by accelerometer-derived estimates. *Nature communications*. 2019;10:1100.

5. Campos AI, Garcia-Marin LM, Byrne EM, Martin NG, Cuellar-Partida G and Renteria ME. Insights into the aetiology of snoring from observational and genetic investigations in the UK Biobank. *Nature communications*. 2020;11:817.

6. VanderWeele TJ, Tchetgen Tchetgen EJ, Cornelis M and Kraft P. Methodological challenges in mendelian randomization. *Epidemiology*. 2014;25:427-35.

| **Supplementary Table 1** Detailed information on the field ID and code for participants who were excluded in sample quality control. | | | |
| --- | --- | --- | --- |
| Phenotype | | Field ID | Code |
| **Observational study** | |  |  |
| Ancestry | 21000 | 2001, 3001, 4001, 2, 2002, 3002, 4002, 3, 2003, 3003, 5, 6, -1, -3 |
| Fracture |  |  |
| Fracture of bone in neoplastic disease | 41270 | M907, M9070, M9071, M9072, M9073, M9074, M9075, M9076, M9077, M9078, M9079 |
| Follow-up care involving removal of fracture plate and other internal fixation devices | 41270 | Z470 |
| Pathological fracture | 41203 | 7331, 73313, 73315, 73316 |
|  | | 41270 | M800, M8000, M8001, M8003, M8007, M8008, M801, M8010, M802, M8021, M8028, M804, M8040, M8041, M8046, M8048, M8049, M805, M8050, M8052, M8053, M8055, M8058, M808, M8080, M8081, M8082, M8086, M8088, M8089, M809, M8090, M8091, M8092, M8093, M8094, M8095, M8096, M8097, M8098, M8099; M844, M8440, M8441, M8442, M8443, M8444, M8445, M8446, M8447, M8448, M8449 |
| **One-sample Mendelian randomization** | |  |  |
| Kinship | | 22021 | -1, 1, 10 |

Abbreviations: ICD-9, the International Classification of Diseases, 9th Revision; ICD-10, the International Classification of Diseases, the 10th Revisions.

| **Supplementary Table 2** Detailed information on the genome-wide association studies for four sleep behaviors (chronotype, insomnia, snoring, and sleep duration) and summary statistics of fracture, falls and bone miner density. | | | | |
| --- | --- | --- | --- | --- |
| Phenotype | Sample size | Ancestry | Links for downloading summary-level data | PMID |
| Exposure |  |  |  |  |
| Chronotype | 697,828 individuals | European ancestry | - | 30696823 |
| Insomnia | 1,331,010 individuals | European ancestry | - | 30804565 |
| Sleep duration | 446,118 individuals | European ancestry | - | 30846698 |
| Snoring | 408,317 individuals  (number of cases ≈ 152,000; number of controls ≈ 256,000) | European ancestry | - | 32060260 |
| Outcome |  |  |  |  |
| Bone mineral density | 426,824 individuals | Caucasian British | <http://www.gefos.org/?q=content/data-release-2018> | 30598549 |
| Falls | 361,194 individuals | \ | www.nealelab.is/uk-biobank/ | - |
| Fracture | 426,795 individuals  (number of cases = 53,184; number of controls = 373,611) | Caucasian British | <http://www.gefos.org/?q=content/data-release-2018> | 30598549 |

| **Supplementary Table 3** Characteristics of the associations of instrumental variables for 4 sleep behaviors (i.e., chronotype, insomnia, snoring, and sleep duration) with fracture risk. | | | | | | | | | | | |
| --- | --- | --- | --- | --- | --- | --- | --- | --- | --- | --- | --- |
| Phenotype | SNP | **Sleep traits** | | | |  | **Fracture** | | | | |
| Effective allele | beta | se | *P*-value | Effective allele | Other allele | beta | se | *P*-value |
| Chronotype | rs10109566 | A | -0.022 | 0.004 | 8.65E-09 |  | A | G | 0.012 | 0.007 | 0.064 |
| Chronotype | rs1013987 | T | -0.029 | 0.004 | 5.57E-13 |  | T | C | 0.002 | 0.007 | 0.670 |
| Chronotype | rs10175975 | T | 0.025 | 0.004 | 1.11E-09 |  | C | T | 0.003 | 0.009 | 0.730 |
| Chronotype | rs10237162 | T | 0.037 | 0.004 | 1.86E-18 |  | T | C | -0.004 | 0.007 | 0.610 |
| Chronotype | rs10254050 | C | -0.058 | 0.005 | 3.58E-29 |  | C | G | -0.010 | 0.008 | 0.240 |
| Chronotype | rs1025601 | T | -0.022 | 0.004 | 2.67E-08 |  | C | T | 0.000 | 0.007 | 0.920 |
| Chronotype | rs10402849 | T | 0.026 | 0.004 | 2.98E-09 |  | C | T | -0.002 | 0.008 | 0.810 |
| Chronotype | rs10520176 | T | 0.038 | 0.004 | 4.54E-24 |  | T | C | -0.009 | 0.007 | 0.190 |
| Chronotype | rs1061032 | T | 0.064 | 0.006 | 1.69E-23 |  | T | G | -0.003 | 0.012 | 0.830 |
| Chronotype | rs1064213 | A | 0.044 | 0.004 | 3.81E-31 |  | G | A | 0.012 | 0.007 | 0.068 |
| Chronotype | rs10742179 | A | 0.035 | 0.004 | 3.38E-15 |  | A | G | -0.005 | 0.007 | 0.460 |
| Chronotype | rs10759208 | T | -0.025 | 0.004 | 4.42E-10 |  | T | C | 0.005 | 0.007 | 0.490 |
| Chronotype | rs10762434 | C | 0.025 | 0.004 | 2.20E-08 |  | G | C | 0.012 | 0.008 | 0.110 |
| Chronotype | rs10818834 | T | 0.030 | 0.004 | 4.73E-12 |  | T | C | -0.002 | 0.007 | 0.750 |
| Chronotype | rs10830107 | A | 0.028 | 0.005 | 4.58E-09 |  | A | G | 0.002 | 0.008 | 0.820 |
| Chronotype | rs10832648 | A | -0.031 | 0.005 | 7.41E-12 |  | C | A | -0.004 | 0.008 | 0.600 |
| Chronotype | rs10838687 | T | 0.035 | 0.005 | 1.90E-13 |  | T | G | 0.006 | 0.008 | 0.420 |
| Chronotype | rs10877962 | T | 0.036 | 0.004 | 3.70E-18 |  | C | T | 0.001 | 0.007 | 0.860 |
| Chronotype | rs10917513 | T | -0.031 | 0.004 | 3.15E-15 |  | C | T | -0.014 | 0.007 | 0.039 |
| Chronotype | rs10951325 | T | 0.034 | 0.004 | 7.80E-20 |  | T | C | -0.012 | 0.007 | 0.100 |
| Chronotype | rs10988239 | T | -0.021 | 0.003 | 3.26E-11 |  | C | T | 0.001 | 0.007 | 0.890 |
| Chronotype | rs11032362 | A | 0.070 | 0.006 | 1.15E-27 |  | G | A | -0.003 | 0.011 | 0.880 |
| Chronotype | rs11102807 | A | -0.022 | 0.004 | 8.09E-09 |  | A | G | -0.001 | 0.007 | 0.860 |
| Chronotype | rs11152350 | A | -0.028 | 0.004 | 1.20E-13 |  | A | C | -0.006 | 0.007 | 0.390 |
| Chronotype | rs11154718 | T | -0.023 | 0.004 | 1.40E-09 |  | T | C | 0.006 | 0.007 | 0.350 |
| Chronotype | rs11165655 | A | -0.028 | 0.004 | 4.78E-13 |  | G | A | 0.007 | 0.007 | 0.280 |
| Chronotype | rs11200159 | A | -0.023 | 0.004 | 4.15E-09 |  | C | A | 0.011 | 0.007 | 0.120 |
| Chronotype | rs11208844 | A | -0.029 | 0.005 | 5.38E-09 |  | G | A | -0.007 | 0.010 | 0.480 |
| Chronotype | rs112201801 | T | -0.085 | 0.013 | 9.87E-11 |  | NA | NA | NA | NA | NA |
| Chronotype | rs113851554 | T | -0.054 | 0.007 | 1.66E-13 |  | G | T | -0.001 | 0.015 | 0.800 |
| Chronotype | rs1144566 | T | 0.231 | 0.011 | 2.00E-95 |  | T | C | 0.033 | 0.019 | 0.110 |
| Chronotype | rs114848860 | A | -0.077 | 0.010 | 1.19E-13 |  | A | T | 0.000 | 0.021 | 0.960 |
| Chronotype | rs115073088 | A | -0.076 | 0.011 | 4.31E-12 |  | A | G | 0.013 | 0.022 | 0.570 |
| Chronotype | rs11545787 | A | -0.050 | 0.004 | 4.20E-30 |  | G | A | -0.007 | 0.008 | 0.320 |
| Chronotype | rs11588913 | A | -0.024 | 0.004 | 3.03E-10 |  | G | A | 0.005 | 0.007 | 0.420 |
| Chronotype | rs11611435 | T | 0.028 | 0.004 | 6.62E-11 |  | T | C | 0.010 | 0.007 | 0.110 |
| Chronotype | rs1163238 | A | -0.024 | 0.004 | 3.45E-08 |  | G | A | -0.017 | 0.007 | 0.013 |
| Chronotype | rs11641239 | T | 0.023 | 0.004 | 4.65E-09 |  | C | T | 0.005 | 0.007 | 0.520 |
| Chronotype | rs11670534 | T | -0.031 | 0.005 | 5.46E-10 |  | C | T | -0.006 | 0.009 | 0.560 |
| Chronotype | rs11677484 | T | 0.023 | 0.004 | 1.18E-09 |  | G | T | -0.014 | 0.008 | 0.062 |
| Chronotype | rs11845599 | A | -0.027 | 0.004 | 5.22E-13 |  | A | G | -0.001 | 0.007 | 0.880 |
| Chronotype | rs12040629 | A | 0.073 | 0.005 | 4.71E-45 |  | G | A | 0.002 | 0.009 | 0.850 |
| Chronotype | rs12051 | A | -0.026 | 0.004 | 4.86E-13 |  | A | G | 0.016 | 0.007 | 0.017 |
| Chronotype | rs12140153 | T | -0.060 | 0.007 | 6.89E-19 |  | G | T | -0.022 | 0.011 | 0.042 |
| Chronotype | rs12195792 | A | 0.034 | 0.004 | 4.80E-15 |  | T | A | 0.004 | 0.007 | 0.550 |
| Chronotype | rs12206814 | C | 0.025 | 0.004 | 1.17E-08 |  | G | C | 0.011 | 0.007 | 0.083 |
| Chronotype | rs12249410 | T | -0.034 | 0.006 | 2.54E-09 |  | G | T | -0.010 | 0.011 | 0.380 |
| Chronotype | rs12298405 | T | -0.023 | 0.004 | 1.68E-10 |  | C | T | 0.007 | 0.007 | 0.280 |
| Chronotype | rs12378543 | T | -0.023 | 0.004 | 4.77E-09 |  | C | T | -0.005 | 0.007 | 0.450 |
| Chronotype | rs12442008 | T | 0.029 | 0.004 | 5.10E-11 |  | C | T | -0.006 | 0.008 | 0.440 |
| Chronotype | rs12442674 | A | 0.023 | 0.004 | 8.00E-09 |  | A | C | -0.002 | 0.007 | 0.820 |
| Chronotype | rs12445235 | C | -0.021 | 0.004 | 1.37E-08 |  | G | C | 0.003 | 0.007 | 0.680 |
| Chronotype | rs12464387 | A | -0.021 | 0.004 | 1.06E-09 |  | A | G | -0.004 | 0.007 | 0.560 |
| Chronotype | rs12518401 | A | -0.024 | 0.004 | 1.58E-10 |  | G | A | 0.001 | 0.007 | 0.940 |
| Chronotype | rs12636669 | T | 0.057 | 0.006 | 5.26E-19 |  | C | T | 0.016 | 0.012 | 0.190 |
| Chronotype | rs12771973 | A | -0.022 | 0.004 | 2.16E-08 |  | G | A | -0.004 | 0.008 | 0.570 |
| Chronotype | rs1278402 | A | 0.028 | 0.005 | 2.40E-09 |  | A | G | 0.010 | 0.007 | 0.150 |
| Chronotype | rs12808544 | A | -0.035 | 0.004 | 3.08E-15 |  | C | A | 0.001 | 0.008 | 0.920 |
| Chronotype | rs12927162 | A | 0.056 | 0.004 | 5.52E-38 |  | A | G | 0.003 | 0.007 | 0.700 |
| Chronotype | rs12950382 | A | 0.023 | 0.004 | 4.70E-08 |  | A | G | -0.005 | 0.007 | 0.540 |
| Chronotype | rs12969848 | T | 0.036 | 0.004 | 1.06E-21 |  | C | T | 0.000 | 0.007 | 0.990 |
| Chronotype | rs13011556 | C | -0.029 | 0.004 | 1.14E-13 |  | C | G | -0.007 | 0.008 | 0.420 |
| Chronotype | rs13065394 | T | -0.027 | 0.004 | 4.14E-11 |  | G | T | -0.001 | 0.007 | 0.830 |
| Chronotype | rs13172141 | A | 0.022 | 0.004 | 1.82E-09 |  | A | T | 0.003 | 0.007 | 0.740 |
| Chronotype | rs13414393 | T | -0.022 | 0.004 | 6.16E-09 |  | T | C | 0.006 | 0.007 | 0.400 |
| Chronotype | rs1398346 | T | 0.026 | 0.005 | 4.35E-08 |  | C | T | 0.000 | 0.010 | 0.950 |
| Chronotype | rs139911 | T | -0.034 | 0.004 | 1.39E-18 |  | C | T | 0.004 | 0.007 | 0.550 |
| Chronotype | rs1421085 | T | -0.042 | 0.004 | 4.56E-32 |  | T | C | 0.014 | 0.007 | 0.033 |
| Chronotype | rs1449403 | A | 0.042 | 0.006 | 6.42E-13 |  | G | A | 0.009 | 0.010 | 0.340 |
| Chronotype | rs1468945 | A | -0.036 | 0.004 | 5.81E-16 |  | G | A | -0.019 | 0.008 | 0.027 |
| Chronotype | rs1474754 | A | -0.021 | 0.004 | 1.76E-08 |  | A | G | -0.010 | 0.007 | 0.160 |
| Chronotype | rs1502249 | A | 0.017 | 0.003 | 2.72E-08 |  | A | G | -0.003 | 0.007 | 0.640 |
| Chronotype | rs1508608 | A | 0.028 | 0.004 | 8.36E-13 |  | A | G | 0.001 | 0.007 | 0.860 |
| Chronotype | rs1559253 | A | 0.022 | 0.004 | 5.48E-09 |  | G | A | -0.006 | 0.007 | 0.420 |
| Chronotype | rs1599374 | A | 0.031 | 0.004 | 3.09E-15 |  | G | A | -0.002 | 0.007 | 0.800 |
| Chronotype | rs16939162 | A | 0.038 | 0.005 | 1.23E-14 |  | A | G | -0.004 | 0.009 | 0.610 |
| Chronotype | rs17302081 | T | 0.022 | 0.004 | 8.21E-09 |  | T | C | 0.006 | 0.007 | 0.320 |
| Chronotype | rs1737893 | T | -0.025 | 0.004 | 9.49E-11 |  | C | T | -0.007 | 0.007 | 0.290 |
| Chronotype | rs17396357 | T | 0.021 | 0.004 | 2.28E-08 |  | C | T | 0.010 | 0.007 | 0.120 |
| Chronotype | rs17448682 | T | 0.035 | 0.004 | 2.82E-16 |  | C | T | 0.002 | 0.008 | 0.760 |
| Chronotype | rs17455138 | T | 0.031 | 0.005 | 1.04E-10 |  | T | C | -0.007 | 0.008 | 0.450 |
| Chronotype | rs17575798 | A | -0.034 | 0.004 | 3.66E-14 |  | G | A | 0.011 | 0.008 | 0.200 |
| Chronotype | rs17577073 | A | 0.025 | 0.004 | 2.02E-10 |  | A | C | 0.005 | 0.007 | 0.440 |
| Chronotype | rs17604349 | A | -0.037 | 0.004 | 2.58E-19 |  | G | A | -0.007 | 0.009 | 0.390 |
| Chronotype | rs17712705 | A | -0.025 | 0.004 | 3.47E-09 |  | A | G | -0.012 | 0.007 | 0.072 |
| Chronotype | rs1788784 | A | -0.027 | 0.004 | 3.72E-10 |  | A | G | 0.004 | 0.007 | 0.530 |
| Chronotype | rs1799464 | A | -0.020 | 0.004 | 2.86E-08 |  | A | G | 0.005 | 0.007 | 0.580 |
| Chronotype | rs1811899 | T | -0.030 | 0.005 | 1.32E-09 |  | T | C | -0.009 | 0.008 | 0.240 |
| Chronotype | rs184033703 | A | 0.058 | 0.008 | 1.31E-13 |  | G | A | 0.009 | 0.014 | 0.570 |
| Chronotype | rs1843888 | A | 0.051 | 0.004 | 2.36E-43 |  | G | A | -0.002 | 0.007 | 0.760 |
| Chronotype | rs187028 | A | -0.022 | 0.003 | 2.15E-10 |  | A | T | -0.003 | 0.007 | 0.640 |
| Chronotype | rs1871729 | A | -0.023 | 0.004 | 7.76E-09 |  | A | G | 0.007 | 0.007 | 0.310 |
| Chronotype | rs1873958 | A | 0.028 | 0.004 | 2.39E-15 |  | G | A | -0.003 | 0.007 | 0.650 |
| Chronotype | rs1886205 | A | 0.029 | 0.004 | 6.25E-14 |  | C | A | 0.009 | 0.008 | 0.300 |
| Chronotype | rs1931814 | A | 0.026 | 0.004 | 2.99E-13 |  | A | G | 0.001 | 0.007 | 0.930 |
| Chronotype | rs2011528 | T | -0.033 | 0.005 | 3.17E-11 |  | C | T | 0.003 | 0.009 | 0.690 |
| Chronotype | rs2050185 | A | 0.022 | 0.004 | 6.62E-09 |  | G | A | -0.006 | 0.007 | 0.360 |
| Chronotype | rs2072413 | T | -0.021 | 0.004 | 4.99E-08 |  | C | T | -0.016 | 0.007 | 0.026 |
| Chronotype | rs2072727 | T | 0.028 | 0.004 | 4.11E-15 |  | T | C | 0.002 | 0.007 | 0.660 |
| Chronotype | rs2166559 | T | -0.033 | 0.005 | 1.56E-09 |  | T | C | 0.004 | 0.009 | 0.640 |
| Chronotype | rs2298117 | T | -0.023 | 0.004 | 4.19E-09 |  | T | C | 0.000 | 0.007 | 0.980 |
| Chronotype | rs2304467 | C | -0.024 | 0.004 | 6.78E-09 |  | C | G | -0.008 | 0.007 | 0.260 |
| Chronotype | rs2322605 | A | -0.022 | 0.004 | 2.43E-09 |  | G | A | 0.004 | 0.007 | 0.540 |
| Chronotype | rs2362775 | T | -0.022 | 0.004 | 6.03E-09 |  | T | C | -0.001 | 0.007 | 0.820 |
| Chronotype | rs2396004 | A | 0.021 | 0.004 | 3.04E-09 |  | A | G | 0.000 | 0.007 | 0.920 |
| Chronotype | rs2433634 | A | -0.027 | 0.004 | 4.57E-10 |  | A | C | -0.016 | 0.007 | 0.029 |
| Chronotype | rs247929 | C | 0.031 | 0.004 | 4.93E-17 |  | G | C | -0.001 | 0.007 | 0.930 |
| Chronotype | rs2514214 | A | 0.027 | 0.005 | 1.98E-09 |  | A | G | -0.004 | 0.007 | 0.590 |
| Chronotype | rs2550298 | T | -0.040 | 0.004 | 5.67E-26 |  | C | T | -0.001 | 0.007 | 0.860 |
| Chronotype | rs2580160 | A | 0.028 | 0.004 | 3.88E-11 |  | A | G | -0.008 | 0.007 | 0.210 |
| Chronotype | rs2593487 | A | -0.029 | 0.004 | 2.03E-12 |  | G | A | 0.000 | 0.007 | 0.970 |
| Chronotype | rs2653349 | A | 0.066 | 0.005 | 2.52E-48 |  | A | G | 0.004 | 0.008 | 0.690 |
| Chronotype | rs2706762 | T | -0.037 | 0.005 | 3.62E-14 |  | C | T | 0.002 | 0.009 | 0.860 |
| Chronotype | rs2737245 | T | 0.034 | 0.004 | 2.68E-17 |  | G | T | 0.022 | 0.007 | 0.003 |
| Chronotype | rs28380327 | A | 0.040 | 0.004 | 5.24E-25 |  | A | T | -0.003 | 0.007 | 0.650 |
| Chronotype | rs2844016 | T | 0.027 | 0.004 | 2.41E-09 |  | T | C | -0.012 | 0.007 | 0.086 |
| Chronotype | rs28458909 | T | -0.070 | 0.006 | 9.52E-34 |  | C | T | -0.001 | 0.010 | 0.920 |
| Chronotype | rs28459838 | T | 0.027 | 0.004 | 1.30E-09 |  | T | C | -0.002 | 0.008 | 0.870 |
| Chronotype | rs2850979 | T | -0.023 | 0.004 | 3.21E-09 |  | C | T | -0.011 | 0.008 | 0.130 |
| Chronotype | rs2881955 | T | 0.027 | 0.004 | 5.23E-11 |  | C | T | -0.003 | 0.007 | 0.720 |
| Chronotype | rs2901796 | A | 0.025 | 0.004 | 6.06E-10 |  | A | G | 0.010 | 0.007 | 0.150 |
| Chronotype | rs2916148 | A | 0.028 | 0.004 | 3.07E-14 |  | G | A | 0.005 | 0.007 | 0.450 |
| Chronotype | rs2944831 | A | 0.025 | 0.004 | 8.50E-11 |  | G | A | 0.000 | 0.007 | 0.920 |
| Chronotype | rs295268 | T | -0.031 | 0.005 | 1.61E-10 |  | T | C | -0.014 | 0.007 | 0.055 |
| Chronotype | rs2978382 | T | 0.023 | 0.004 | 6.47E-09 |  | T | C | 0.010 | 0.007 | 0.150 |
| Chronotype | rs2979139 | A | -0.027 | 0.004 | 3.92E-14 |  | A | G | 0.005 | 0.007 | 0.470 |
| Chronotype | rs308521 | T | 0.028 | 0.003 | 3.67E-17 |  | T | C | -0.004 | 0.007 | 0.580 |
| Chronotype | rs3138490 | A | 0.024 | 0.004 | 6.98E-10 |  | T | A | -0.007 | 0.007 | 0.260 |
| Chronotype | rs34054660 | A | 0.025 | 0.005 | 4.48E-08 |  | A | G | 0.011 | 0.007 | 0.085 |
| Chronotype | rs35346733 | A | -0.032 | 0.005 | 4.37E-10 |  | G | A | 0.002 | 0.008 | 0.760 |
| Chronotype | rs35524253 | A | 0.034 | 0.004 | 3.19E-18 |  | G | A | -0.011 | 0.007 | 0.100 |
| Chronotype | rs359248 | T | -0.028 | 0.003 | 2.23E-16 |  | T | G | 0.010 | 0.007 | 0.130 |
| Chronotype | rs36055559 | A | -0.036 | 0.005 | 7.09E-12 |  | G | A | -0.014 | 0.009 | 0.100 |
| Chronotype | rs3760381 | A | 0.027 | 0.004 | 3.84E-10 |  | G | A | 0.000 | 0.008 | 1.000 |
| Chronotype | rs3807651 | A | 0.025 | 0.004 | 8.77E-09 |  | A | T | 0.008 | 0.007 | 0.240 |
| Chronotype | rs3808964 | T | 0.020 | 0.004 | 1.35E-08 |  | G | T | -0.003 | 0.007 | 0.630 |
| Chronotype | rs3815983 | T | -0.022 | 0.003 | 4.17E-10 |  | C | T | 0.010 | 0.007 | 0.130 |
| Chronotype | rs3850174 | A | -0.035 | 0.004 | 2.88E-15 |  | T | A | 0.021 | 0.008 | 0.005 |
| Chronotype | rs3857599 | A | 0.032 | 0.005 | 2.31E-09 |  | C | A | 0.007 | 0.009 | 0.430 |
| Chronotype | rs3867239 | A | 0.026 | 0.004 | 1.94E-11 |  | G | A | -0.011 | 0.007 | 0.093 |
| Chronotype | rs3923809 | A | -0.022 | 0.004 | 3.10E-08 |  | A | G | -0.013 | 0.007 | 0.092 |
| Chronotype | rs4027217 | A | -0.026 | 0.005 | 4.46E-08 |  | C | A | 0.010 | 0.008 | 0.220 |
| Chronotype | rs412000 | C | -0.022 | 0.004 | 1.67E-09 |  | G | C | 0.000 | 0.007 | 0.960 |
| Chronotype | rs4121878 | C | 0.022 | 0.004 | 8.41E-09 |  | G | C | 0.007 | 0.007 | 0.290 |
| Chronotype | rs42210 | C | -0.029 | 0.005 | 4.91E-10 |  | G | C | 0.006 | 0.007 | 0.340 |
| Chronotype | rs4236237 | A | -0.024 | 0.004 | 1.04E-10 |  | C | A | -0.008 | 0.007 | 0.210 |
| Chronotype | rs4241964 | T | -0.029 | 0.004 | 8.74E-16 |  | T | G | -0.003 | 0.007 | 0.660 |
| Chronotype | rs4269995 | T | -0.034 | 0.004 | 6.44E-20 |  | C | T | 0.002 | 0.008 | 0.790 |
| Chronotype | rs4365329 | A | -0.019 | 0.003 | 2.68E-08 |  | A | T | 0.001 | 0.007 | 0.900 |
| Chronotype | rs4419127 | A | 0.044 | 0.004 | 8.00E-30 |  | A | G | 0.008 | 0.007 | 0.220 |
| Chronotype | rs4535583 | T | 0.021 | 0.004 | 3.68E-08 |  | C | T | 0.010 | 0.007 | 0.180 |
| Chronotype | rs4550384 | T | 0.024 | 0.004 | 1.65E-09 |  | T | G | -0.005 | 0.008 | 0.500 |
| Chronotype | rs45597035 | A | -0.022 | 0.004 | 2.00E-08 |  | A | G | -0.012 | 0.007 | 0.091 |
| Chronotype | rs465670 | T | 0.024 | 0.004 | 2.74E-10 |  | C | T | -0.003 | 0.007 | 0.610 |
| Chronotype | rs4666682 | A | -0.025 | 0.004 | 3.68E-09 |  | G | A | 0.012 | 0.009 | 0.160 |
| Chronotype | rs4672458 | T | -0.022 | 0.004 | 1.66E-10 |  | C | T | -0.004 | 0.007 | 0.500 |
| Chronotype | rs4690085 | A | -0.019 | 0.003 | 2.02E-08 |  | A | G | 0.006 | 0.007 | 0.350 |
| Chronotype | rs4698678 | C | 0.031 | 0.005 | 1.25E-11 |  | C | G | -0.005 | 0.007 | 0.510 |
| Chronotype | rs4729854 | A | -0.049 | 0.004 | 4.28E-36 |  | T | A | 0.000 | 0.007 | 0.930 |
| Chronotype | rs4785296 | C | 0.026 | 0.004 | 1.37E-09 |  | G | C | -0.007 | 0.008 | 0.400 |
| Chronotype | rs4800998 | A | 0.039 | 0.005 | 4.63E-14 |  | T | A | -0.011 | 0.008 | 0.200 |
| Chronotype | rs481214 | A | 0.023 | 0.004 | 2.05E-08 |  | A | T | -0.013 | 0.007 | 0.055 |
| Chronotype | rs4860734 | A | 0.020 | 0.004 | 2.66E-08 |  | G | A | 0.013 | 0.007 | 0.065 |
| Chronotype | rs486416 | A | -0.020 | 0.003 | 1.39E-09 |  | G | A | -0.003 | 0.007 | 0.700 |
| Chronotype | rs4878734 | A | 0.022 | 0.004 | 4.69E-08 |  | A | T | -0.003 | 0.007 | 0.660 |
| Chronotype | rs4903203 | A | 0.025 | 0.004 | 1.67E-10 |  | A | G | 0.009 | 0.007 | 0.180 |
| Chronotype | rs4936290 | A | -0.023 | 0.004 | 1.31E-10 |  | A | C | -0.010 | 0.007 | 0.180 |
| Chronotype | rs495593 | A | 0.023 | 0.004 | 3.67E-09 |  | G | A | -0.005 | 0.007 | 0.490 |
| Chronotype | rs497338 | T | 0.027 | 0.004 | 1.91E-10 |  | C | T | 0.000 | 0.007 | 0.990 |
| Chronotype | rs555784 | A | -0.025 | 0.004 | 3.18E-10 |  | T | A | -0.003 | 0.007 | 0.700 |
| Chronotype | rs55846845 | A | -0.021 | 0.003 | 4.71E-11 |  | G | A | 0.003 | 0.007 | 0.610 |
| Chronotype | rs56113850 | T | -0.023 | 0.004 | 2.38E-10 |  | T | C | 0.008 | 0.007 | 0.270 |
| Chronotype | rs57236847 | C | 0.027 | 0.005 | 4.38E-09 |  | C | G | -0.005 | 0.007 | 0.500 |
| Chronotype | rs58681483 | A | 0.035 | 0.006 | 9.69E-09 |  | A | G | -0.012 | 0.012 | 0.340 |
| Chronotype | rs58876439 | A | 0.047 | 0.007 | 3.05E-11 |  | G | A | -0.002 | 0.013 | 0.920 |
| Chronotype | rs59986227 | C | -0.031 | 0.005 | 1.39E-11 |  | C | G | -0.011 | 0.008 | 0.150 |
| Chronotype | rs6007594 | A | -0.025 | 0.004 | 6.36E-10 |  | G | A | 0.014 | 0.007 | 0.057 |
| Chronotype | rs6047481 | A | 0.025 | 0.004 | 3.40E-09 |  | A | T | 0.003 | 0.007 | 0.730 |
| Chronotype | rs6131805 | T | 0.026 | 0.004 | 1.68E-11 |  | T | G | 0.001 | 0.007 | 0.840 |
| Chronotype | rs6131942 | A | -0.026 | 0.003 | 7.42E-16 |  | A | G | -0.001 | 0.007 | 0.900 |
| Chronotype | rs61875203 | T | 0.026 | 0.004 | 1.97E-09 |  | C | T | 0.004 | 0.007 | 0.610 |
| Chronotype | rs61990287 | A | 0.025 | 0.004 | 6.04E-09 |  | C | A | -0.008 | 0.007 | 0.280 |
| Chronotype | rs62082402 | T | 0.050 | 0.006 | 6.90E-19 |  | G | T | -0.003 | 0.008 | 0.690 |
| Chronotype | rs621421 | T | -0.027 | 0.004 | 2.17E-14 |  | T | C | 0.005 | 0.007 | 0.410 |
| Chronotype | rs62182135 | A | -0.024 | 0.003 | 1.13E-12 |  | C | A | 0.015 | 0.007 | 0.030 |
| Chronotype | rs62465218 | A | -0.027 | 0.005 | 9.74E-09 |  | C | A | 0.015 | 0.009 | 0.085 |
| Chronotype | rs62479736 | T | 0.024 | 0.004 | 4.10E-10 |  | T | G | -0.005 | 0.007 | 0.480 |
| Chronotype | rs6429233 | A | 0.020 | 0.004 | 1.20E-08 |  | G | A | -0.004 | 0.007 | 0.550 |
| Chronotype | rs6433478 | T | -0.025 | 0.004 | 1.17E-11 |  | T | C | -0.006 | 0.007 | 0.320 |
| Chronotype | rs6468316 | T | -0.020 | 0.004 | 2.96E-08 |  | C | T | 0.004 | 0.007 | 0.490 |
| Chronotype | rs6477309 | T | 0.031 | 0.004 | 4.64E-15 |  | C | T | -0.004 | 0.007 | 0.510 |
| Chronotype | rs6560218 | T | -0.022 | 0.004 | 1.39E-08 |  | C | T | 0.010 | 0.007 | 0.140 |
| Chronotype | rs662094 | A | 0.028 | 0.004 | 5.45E-13 |  | G | A | 0.003 | 0.007 | 0.620 |
| Chronotype | rs66617308 | T | 0.018 | 0.003 | 4.40E-08 |  | T | C | -0.004 | 0.007 | 0.610 |
| Chronotype | rs6690292 | T | -0.025 | 0.004 | 1.54E-08 |  | C | T | 0.009 | 0.007 | 0.180 |
| Chronotype | rs6727752 | A | 0.026 | 0.004 | 2.27E-10 |  | G | A | -0.004 | 0.007 | 0.640 |
| Chronotype | rs6794796 | A | 0.025 | 0.004 | 3.07E-10 |  | A | G | -0.010 | 0.007 | 0.140 |
| Chronotype | rs67988891 | C | -0.036 | 0.004 | 1.63E-18 |  | C | G | -0.012 | 0.007 | 0.100 |
| Chronotype | rs6816922 | A | -0.020 | 0.004 | 4.26E-08 |  | C | A | 0.009 | 0.007 | 0.170 |
| Chronotype | rs6838677 | A | -0.021 | 0.004 | 2.68E-08 |  | A | C | 0.015 | 0.007 | 0.041 |
| Chronotype | rs6846730 | T | -0.032 | 0.004 | 2.54E-14 |  | C | T | -0.012 | 0.008 | 0.120 |
| Chronotype | rs695459 | T | -0.022 | 0.004 | 1.17E-08 |  | C | T | -0.004 | 0.007 | 0.600 |
| Chronotype | rs6958557 | T | 0.026 | 0.004 | 4.04E-12 |  | T | G | -0.002 | 0.007 | 0.750 |
| Chronotype | rs6967481 | T | 0.032 | 0.003 | 8.39E-21 |  | C | T | -0.008 | 0.007 | 0.260 |
| Chronotype | rs6968240 | A | 0.022 | 0.003 | 2.64E-10 |  | C | A | 0.001 | 0.007 | 0.850 |
| Chronotype | rs6988733 | T | 0.023 | 0.004 | 2.79E-08 |  | C | T | 0.004 | 0.007 | 0.560 |
| Chronotype | rs6993892 | T | -0.035 | 0.004 | 5.24E-20 |  | T | C | 0.012 | 0.007 | 0.086 |
| Chronotype | rs7111582 | A | -0.039 | 0.005 | 4.11E-14 |  | G | A | -0.012 | 0.011 | 0.290 |
| Chronotype | rs7143933 | T | 0.025 | 0.004 | 6.52E-09 |  | T | G | 0.007 | 0.007 | 0.370 |
| Chronotype | rs71523448 | C | -0.050 | 0.007 | 1.62E-13 |  | G | C | 0.000 | 0.012 | 0.970 |
| Chronotype | rs7203707 | A | -0.020 | 0.003 | 5.00E-10 |  | C | A | 0.007 | 0.007 | 0.320 |
| Chronotype | rs7248205 | T | 0.027 | 0.004 | 9.96E-13 |  | C | T | 0.014 | 0.007 | 0.038 |
| Chronotype | rs72720396 | A | -0.042 | 0.004 | 3.61E-21 |  | A | G | -0.003 | 0.008 | 0.850 |
| Chronotype | rs72729847 | T | -0.030 | 0.005 | 1.35E-10 |  | T | C | -0.003 | 0.008 | 0.670 |
| Chronotype | rs72790386 | T | 0.060 | 0.011 | 2.07E-08 |  | G | T | -0.030 | 0.018 | 0.093 |
| Chronotype | rs72829706 | A | 0.056 | 0.009 | 1.24E-10 |  | A | G | -0.021 | 0.017 | 0.250 |
| Chronotype | rs72841368 | A | -0.030 | 0.005 | 2.44E-11 |  | A | T | 0.024 | 0.008 | 0.006 |
| Chronotype | rs72950188 | T | 0.045 | 0.007 | 1.67E-10 |  | T | C | 0.000 | 0.012 | 0.900 |
| Chronotype | rs7298532 | T | 0.027 | 0.004 | 1.42E-10 |  | T | C | -0.004 | 0.008 | 0.520 |
| Chronotype | rs7299922 | A | 0.024 | 0.004 | 5.38E-11 |  | A | G | 0.007 | 0.007 | 0.280 |
| Chronotype | rs73026775 | A | -0.034 | 0.006 | 2.16E-08 |  | G | A | -0.021 | 0.010 | 0.034 |
| Chronotype | rs7304278 | A | -0.029 | 0.004 | 1.53E-14 |  | A | G | 0.000 | 0.007 | 0.980 |
| Chronotype | rs73050286 | T | 0.030 | 0.004 | 3.52E-11 |  | T | C | 0.007 | 0.008 | 0.380 |
| Chronotype | rs7429614 | T | 0.035 | 0.004 | 2.45E-19 |  | G | T | 0.004 | 0.007 | 0.520 |
| Chronotype | rs74357745 | A | 0.031 | 0.005 | 3.88E-10 |  | A | G | 0.003 | 0.010 | 0.840 |
| Chronotype | rs747003 | T | 0.020 | 0.004 | 2.78E-08 |  | T | C | 0.007 | 0.007 | 0.330 |
| Chronotype | rs75120545 | T | 0.086 | 0.010 | 6.84E-17 |  | C | T | 0.034 | 0.020 | 0.071 |
| Chronotype | rs76064513 | T | 0.034 | 0.006 | 3.09E-08 |  | C | T | 0.009 | 0.010 | 0.330 |
| Chronotype | rs76518095 | T | 0.040 | 0.007 | 7.82E-09 |  | C | T | -0.009 | 0.012 | 0.500 |
| Chronotype | rs766406 | T | -0.024 | 0.004 | 6.98E-10 |  | G | T | 0.009 | 0.007 | 0.230 |
| Chronotype | rs7700110 | A | 0.024 | 0.004 | 4.11E-09 |  | G | A | 0.006 | 0.007 | 0.490 |
| Chronotype | rs7701529 | A | -0.030 | 0.004 | 5.10E-12 |  | A | T | -0.002 | 0.008 | 0.820 |
| Chronotype | rs7721608 | T | 0.020 | 0.003 | 2.01E-09 |  | G | T | 0.000 | 0.007 | 0.990 |
| Chronotype | rs77248969 | A | -0.033 | 0.006 | 4.91E-09 |  | G | A | -0.006 | 0.012 | 0.530 |
| Chronotype | rs77960 | A | 0.022 | 0.003 | 8.29E-11 |  | G | A | -0.021 | 0.007 | 0.003 |
| Chronotype | rs7845620 | A | -0.043 | 0.005 | 8.09E-19 |  | A | C | 0.000 | 0.009 | 0.990 |
| Chronotype | rs7943634 | T | -0.024 | 0.004 | 8.55E-10 |  | C | T | -0.001 | 0.007 | 0.920 |
| Chronotype | rs7959983 | T | -0.030 | 0.004 | 4.54E-16 |  | T | C | 0.034 | 0.007 | 0.000 |
| Chronotype | rs7975791 | T | 0.051 | 0.009 | 5.03E-09 |  | C | T | -0.010 | 0.017 | 0.550 |
| Chronotype | rs80097534 | T | -0.036 | 0.006 | 2.78E-09 |  | G | T | -0.018 | 0.011 | 0.130 |
| Chronotype | rs80271258 | T | -0.089 | 0.006 | 4.16E-43 |  | C | T | 0.019 | 0.012 | 0.110 |
| Chronotype | rs8044054 | T | 0.031 | 0.004 | 7.05E-17 |  | C | T | 0.016 | 0.007 | 0.025 |
| Chronotype | rs8072058 | A | -0.028 | 0.005 | 8.59E-09 |  | T | A | -0.015 | 0.008 | 0.066 |
| Chronotype | rs812925 | C | -0.031 | 0.004 | 6.70E-17 |  | C | G | 0.000 | 0.007 | 0.950 |
| Chronotype | rs848552 | C | -0.028 | 0.004 | 4.89E-14 |  | C | G | 0.014 | 0.007 | 0.030 |
| Chronotype | rs909757 | T | 0.020 | 0.003 | 1.03E-08 |  | T | C | 0.009 | 0.007 | 0.130 |
| Chronotype | rs9347926 | A | 0.026 | 0.004 | 1.28E-13 |  | A | T | -0.008 | 0.007 | 0.250 |
| Chronotype | rs9381812 | A | -0.050 | 0.004 | 1.15E-33 |  | A | G | -0.011 | 0.007 | 0.100 |
| Chronotype | rs938836 | A | -0.021 | 0.003 | 1.01E-09 |  | G | A | 0.013 | 0.007 | 0.064 |
| Chronotype | rs9394154 | C | -0.022 | 0.004 | 8.35E-10 |  | C | G | -0.009 | 0.007 | 0.180 |
| Chronotype | rs9416744 | A | 0.034 | 0.004 | 7.38E-17 |  | A | C | -0.001 | 0.007 | 0.890 |
| Chronotype | rs9436119 | A | 0.040 | 0.003 | 5.70E-30 |  | G | A | 0.026 | 0.007 | 0.000 |
| Chronotype | rs9465253 | T | 0.023 | 0.004 | 3.00E-09 |  | C | T | -0.005 | 0.007 | 0.480 |
| Chronotype | rs9479402 | T | -0.219 | 0.018 | 4.05E-33 |  | T | C | 0.008 | 0.032 | 0.770 |
| Chronotype | rs9558942 | T | -0.019 | 0.004 | 4.43E-08 |  | T | C | -0.004 | 0.007 | 0.600 |
| Chronotype | rs9571526 | T | -0.027 | 0.005 | 5.14E-09 |  | T | G | 0.008 | 0.008 | 0.290 |
| Chronotype | rs9573980 | A | 0.127 | 0.010 | 5.03E-36 |  | A | G | -0.010 | 0.018 | 0.630 |
| Chronotype | rs9597241 | A | 0.033 | 0.004 | 9.39E-14 |  | A | C | -0.006 | 0.008 | 0.470 |
| Chronotype | rs9636202 | A | -0.026 | 0.004 | 3.67E-11 |  | G | A | 0.007 | 0.007 | 0.370 |
| Chronotype | rs9664044 | T | -0.027 | 0.004 | 2.00E-09 |  | C | T | 0.011 | 0.008 | 0.150 |
| Chronotype | rs975025 | T | -0.049 | 0.007 | 6.98E-14 |  | C | T | -0.014 | 0.012 | 0.240 |
| Chronotype | rs9817910 | A | -0.022 | 0.003 | 1.78E-10 |  | G | A | 0.002 | 0.007 | 0.700 |
| Chronotype | rs9836621 | T | -0.028 | 0.004 | 1.84E-13 |  | C | T | 0.000 | 0.007 | 0.990 |
| Chronotype | rs9950528 | A | -0.024 | 0.004 | 4.32E-09 |  | A | G | 0.003 | 0.007 | 0.630 |
| Chronotype | rs9956387 | A | -0.020 | 0.004 | 2.67E-08 |  | A | T | 0.001 | 0.007 | 0.890 |
| Chronotype | rs9964420 | A | -0.049 | 0.004 | 2.26E-37 |  | C | A | 0.001 | 0.007 | 0.920 |
| Chronotype | rs9991917 | A | 0.045 | 0.008 | 1.12E-08 |  | G | A | -0.011 | 0.008 | 0.200 |
| Chronotype | rs9997394 | A | -0.025 | 0.004 | 1.05E-09 |  | G | A | -0.002 | 0.007 | 0.730 |
| Insomnia | rs1015438 | A | 0.058 | 0.008 | 2.51E-14 |  | G | A | 0.005 | 0.008 | 0.530 |
| Insomnia | rs1031654 | A | -0.051 | 0.007 | 3.88E-12 |  | C | A | 0.007 | 0.008 | 0.420 |
| Insomnia | rs1038093 | T | 0.039 | 0.006 | 2.47E-10 |  | T | C | 0.013 | 0.007 | 0.051 |
| Insomnia | rs10502966 | A | -0.039 | 0.006 | 8.54E-11 |  | A | G | -0.008 | 0.007 | 0.220 |
| Insomnia | rs10756571 | T | 0.036 | 0.006 | 1.80E-08 |  | C | T | -0.003 | 0.007 | 0.710 |
| Insomnia | rs10758593 | A | -0.036 | 0.006 | 4.90E-09 |  | G | A | 0.003 | 0.007 | 0.590 |
| Insomnia | rs10761240 | A | -0.043 | 0.006 | 2.12E-12 |  | G | A | 0.004 | 0.007 | 0.640 |
| Insomnia | rs10800992 | T | 0.042 | 0.006 | 3.84E-12 |  | C | T | -0.004 | 0.007 | 0.540 |
| Insomnia | rs10825503 | T | 0.033 | 0.006 | 1.43E-08 |  | G | T | -0.007 | 0.007 | 0.300 |
| Insomnia | rs10865954 | T | 0.042 | 0.006 | 1.92E-11 |  | T | C | 0.015 | 0.007 | 0.034 |
| Insomnia | rs10898940 | A | 0.034 | 0.006 | 8.09E-09 |  | A | C | 0.000 | 0.007 | 0.980 |
| Insomnia | rs10928256 | T | 0.034 | 0.006 | 1.61E-08 |  | T | C | 0.000 | 0.007 | 1.000 |
| Insomnia | rs10944696 | A | -0.038 | 0.007 | 7.99E-09 |  | G | A | 0.011 | 0.007 | 0.160 |
| Insomnia | rs10947428 | T | -0.068 | 0.007 | 9.06E-21 |  | T | C | -0.004 | 0.008 | 0.600 |
| Insomnia | rs10947690 | A | -0.047 | 0.007 | 4.04E-12 |  | A | G | -0.006 | 0.007 | 0.450 |
| Insomnia | rs10947987 | T | -0.033 | 0.006 | 4.08E-08 |  | C | T | -0.009 | 0.007 | 0.170 |
| Insomnia | rs10955647 | T | 0.033 | 0.006 | 1.84E-08 |  | G | T | -0.002 | 0.007 | 0.800 |
| Insomnia | rs11001276 | A | -0.038 | 0.007 | 2.52E-08 |  | A | T | 0.001 | 0.007 | 0.800 |
| Insomnia | rs11090039 | A | 0.039 | 0.007 | 1.82E-09 |  | G | A | 0.005 | 0.007 | 0.480 |
| Insomnia | rs11119409 | T | -0.035 | 0.006 | 1.19E-08 |  | C | T | 0.000 | 0.007 | 0.990 |
| Insomnia | rs11149313 | A | 0.040 | 0.007 | 2.38E-09 |  | A | G | 0.004 | 0.007 | 0.580 |
| Insomnia | rs113851554 | T | 0.206 | 0.014 | 1.56E-51 |  | G | T | -0.001 | 0.015 | 0.800 |
| Insomnia | rs11588755 | A | -0.035 | 0.006 | 5.14E-09 |  | G | A | 0.003 | 0.007 | 0.720 |
| Insomnia | rs11605348 | A | -0.045 | 0.006 | 7.01E-13 |  | G | A | 0.020 | 0.007 | 0.004 |
| Insomnia | rs116466468 | T | 0.044 | 0.007 | 2.11E-10 |  | T | C | -0.014 | 0.008 | 0.065 |
| Insomnia | rs11650304 | C | 0.067 | 0.012 | 1.23E-08 |  | C | G | -0.003 | 0.013 | 0.850 |
| Insomnia | rs11679943 | A | 0.037 | 0.006 | 3.16E-09 |  | G | A | 0.006 | 0.007 | 0.400 |
| Insomnia | rs11722569 | T | 0.034 | 0.006 | 2.91E-08 |  | C | T | 0.006 | 0.007 | 0.410 |
| Insomnia | rs11756035 | C | 0.051 | 0.009 | 1.29E-08 |  | G | C | -0.005 | 0.010 | 0.640 |
| Insomnia | rs11803128 | A | -0.041 | 0.006 | 6.85E-11 |  | A | G | 0.006 | 0.007 | 0.380 |
| Insomnia | rs118166957 | T | 0.068 | 0.008 | 1.95E-16 |  | C | T | -0.008 | 0.009 | 0.400 |
| Insomnia | rs12030482 | A | 0.041 | 0.007 | 8.16E-09 |  | T | A | 0.009 | 0.008 | 0.260 |
| Insomnia | rs12187443 | T | 0.040 | 0.006 | 1.64E-10 |  | T | C | 0.008 | 0.007 | 0.210 |
| Insomnia | rs12251016 | A | -0.039 | 0.006 | 3.89E-10 |  | A | T | -0.012 | 0.007 | 0.073 |
| Insomnia | rs12310246 | A | 0.045 | 0.007 | 4.74E-11 |  | G | A | -0.008 | 0.008 | 0.330 |
| Insomnia | rs12520974 | T | -0.036 | 0.006 | 1.69E-09 |  | T | C | -0.015 | 0.007 | 0.024 |
| Insomnia | rs12666306 | A | 0.042 | 0.006 | 2.24E-12 |  | A | G | 0.006 | 0.007 | 0.350 |
| Insomnia | rs12790660 | T | -0.040 | 0.006 | 4.49E-10 |  | T | C | 0.005 | 0.007 | 0.420 |
| Insomnia | rs1289939 | T | -0.041 | 0.007 | 6.00E-09 |  | T | C | 0.001 | 0.008 | 1.000 |
| Insomnia | rs12912299 | T | -0.043 | 0.006 | 4.42E-13 |  | C | T | 0.007 | 0.007 | 0.250 |
| Insomnia | rs12917449 | A | -0.042 | 0.008 | 2.97E-08 |  | A | C | -0.011 | 0.008 | 0.180 |
| Insomnia | rs12983032 | A | -0.043 | 0.006 | 1.07E-11 |  | G | A | 0.014 | 0.007 | 0.038 |
| Insomnia | rs12991815 | C | 0.040 | 0.006 | 3.02E-11 |  | C | G | 0.006 | 0.007 | 0.360 |
| Insomnia | rs13010288 | T | -0.060 | 0.009 | 9.26E-12 |  | G | T | 0.013 | 0.010 | 0.190 |
| Insomnia | rs13135092 | A | -0.089 | 0.011 | 2.53E-16 |  | A | G | -0.021 | 0.012 | 0.077 |
| Insomnia | rs13138995 | A | 0.034 | 0.006 | 1.97E-08 |  | A | G | -0.002 | 0.007 | 0.930 |
| Insomnia | rs1519102 | C | -0.037 | 0.006 | 1.90E-08 |  | G | C | -0.006 | 0.007 | 0.360 |
| Insomnia | rs1530938 | A | 0.036 | 0.006 | 8.82E-10 |  | A | G | -0.004 | 0.007 | 0.470 |
| Insomnia | rs1536053 | T | -0.038 | 0.006 | 6.04E-09 |  | C | T | 0.000 | 0.007 | 0.980 |
| Insomnia | rs1567084 | A | 0.033 | 0.006 | 2.14E-08 |  | A | G | -0.001 | 0.007 | 0.980 |
| Insomnia | rs1620977 | A | 0.052 | 0.007 | 2.27E-14 |  | A | G | 0.011 | 0.007 | 0.091 |
| Insomnia | rs16903122 | T | 0.055 | 0.007 | 9.04E-16 |  | C | T | 0.001 | 0.008 | 0.860 |
| Insomnia | rs16990210 | T | -0.046 | 0.008 | 1.97E-08 |  | T | C | 0.006 | 0.009 | 0.500 |
| Insomnia | rs17005118 | A | 0.042 | 0.007 | 6.13E-10 |  | G | A | -0.010 | 0.007 | 0.150 |
| Insomnia | rs17025198 | A | 0.041 | 0.007 | 2.19E-08 |  | G | A | 0.015 | 0.008 | 0.064 |
| Insomnia | rs17083297 | A | -0.044 | 0.008 | 1.60E-08 |  | C | A | 0.001 | 0.009 | 0.980 |
| Insomnia | rs17223714 | A | 0.046 | 0.007 | 2.44E-10 |  | A | G | 0.003 | 0.008 | 0.690 |
| Insomnia | rs1731951 | A | -0.035 | 0.006 | 1.36E-08 |  | T | A | -0.007 | 0.007 | 0.400 |
| Insomnia | rs17367725 | T | -0.036 | 0.006 | 9.29E-09 |  | C | T | -0.001 | 0.007 | 0.910 |
| Insomnia | rs17520265 | A | -0.091 | 0.016 | 2.87E-08 |  | G | A | 0.025 | 0.018 | 0.140 |
| Insomnia | rs17643634 | T | -0.060 | 0.008 | 1.34E-13 |  | C | T | 0.000 | 0.009 | 0.980 |
| Insomnia | rs176644 | T | 0.035 | 0.006 | 9.49E-09 |  | G | T | -0.005 | 0.007 | 0.390 |
| Insomnia | rs1861412 | A | 0.038 | 0.006 | 1.67E-10 |  | G | A | -0.005 | 0.007 | 0.520 |
| Insomnia | rs190073 | A | -0.034 | 0.006 | 2.86E-08 |  | G | A | 0.006 | 0.007 | 0.380 |
| Insomnia | rs1927902 | T | 0.053 | 0.007 | 1.15E-14 |  | T | C | 0.001 | 0.008 | 0.900 |
| Insomnia | rs1937447 | C | -0.039 | 0.007 | 2.08E-08 |  | C | G | 0.008 | 0.008 | 0.340 |
| Insomnia | rs2030672 | C | 0.034 | 0.006 | 1.10E-08 |  | G | C | -0.003 | 0.007 | 0.630 |
| Insomnia | rs2089358 | T | -0.041 | 0.007 | 2.75E-10 |  | C | T | -0.002 | 0.007 | 0.810 |
| Insomnia | rs214934 | A | -0.038 | 0.006 | 3.16E-09 |  | T | A | 0.003 | 0.007 | 0.690 |
| Insomnia | rs2216427 | C | 0.035 | 0.006 | 1.60E-08 |  | C | G | 0.007 | 0.007 | 0.300 |
| Insomnia | rs2221119 | C | 0.036 | 0.006 | 2.00E-09 |  | G | C | 0.002 | 0.007 | 0.780 |
| Insomnia | rs224029 | T | -0.039 | 0.006 | 2.51E-10 |  | T | C | -0.007 | 0.007 | 0.370 |
| Insomnia | rs2286729 | A | 0.070 | 0.011 | 5.37E-11 |  | G | A | -0.002 | 0.012 | 0.820 |
| Insomnia | rs2364921 | T | -0.034 | 0.006 | 2.13E-08 |  | T | C | 0.002 | 0.007 | 0.840 |
| Insomnia | rs2388840 | A | -0.037 | 0.006 | 1.37E-09 |  | G | A | 0.008 | 0.007 | 0.180 |
| Insomnia | rs2389631 | A | -0.040 | 0.006 | 2.03E-10 |  | A | C | -0.004 | 0.007 | 0.530 |
| Insomnia | rs2431108 | T | -0.053 | 0.006 | 7.83E-17 |  | T | C | -0.021 | 0.007 | 0.004 |
| Insomnia | rs2598293 | T | 0.035 | 0.006 | 2.48E-09 |  | C | T | -0.012 | 0.007 | 0.054 |
| Insomnia | rs2737240 | A | 0.036 | 0.007 | 3.37E-08 |  | A | G | 0.022 | 0.007 | 0.002 |
| Insomnia | rs2792990 | C | 0.054 | 0.008 | 1.15E-10 |  | G | C | 0.003 | 0.009 | 0.720 |
| Insomnia | rs2838787 | A | -0.036 | 0.006 | 7.65E-09 |  | G | A | 0.010 | 0.007 | 0.130 |
| Insomnia | rs28552587 | A | 0.033 | 0.006 | 3.30E-08 |  | A | G | 0.005 | 0.007 | 0.550 |
| Insomnia | rs28582096 | A | -0.054 | 0.007 | 1.74E-13 |  | G | A | -0.016 | 0.008 | 0.042 |
| Insomnia | rs28611339 | T | 0.058 | 0.009 | 8.46E-11 |  | G | T | -0.022 | 0.010 | 0.015 |
| Insomnia | rs2867690 | T | 0.042 | 0.008 | 3.70E-08 |  | T | C | -0.021 | 0.008 | 0.013 |
| Insomnia | rs3131638 | A | -0.044 | 0.007 | 7.88E-10 |  | A | G | 0.015 | 0.008 | 0.063 |
| Insomnia | rs314281 | T | -0.043 | 0.006 | 6.03E-13 |  | T | C | 0.011 | 0.007 | 0.100 |
| Insomnia | rs3184470 | A | -0.038 | 0.006 | 9.73E-10 |  | G | A | 0.002 | 0.007 | 0.850 |
| Insomnia | rs324017 | A | 0.039 | 0.007 | 1.61E-09 |  | A | C | -0.003 | 0.007 | 0.690 |
| Insomnia | rs34214423 | A | 0.045 | 0.008 | 3.18E-09 |  | A | C | 0.015 | 0.008 | 0.069 |
| Insomnia | rs34490907 | C | 0.054 | 0.009 | 1.76E-08 |  | C | G | 0.013 | 0.010 | 0.190 |
| Insomnia | rs34967082 | A | 0.035 | 0.006 | 4.34E-09 |  | G | A | -0.005 | 0.007 | 0.420 |
| Insomnia | rs35110063 | A | 0.039 | 0.006 | 8.82E-11 |  | G | A | -0.004 | 0.007 | 0.460 |
| Insomnia | rs35322724 | A | 0.049 | 0.006 | 3.75E-16 |  | C | A | -0.001 | 0.007 | 0.850 |
| Insomnia | rs37445 | A | -0.036 | 0.006 | 4.88E-09 |  | A | G | -0.006 | 0.007 | 0.360 |
| Insomnia | rs3774751 | T | -0.041 | 0.006 | 7.32E-12 |  | G | T | -0.005 | 0.007 | 0.450 |
| Insomnia | rs3902952 | T | 0.048 | 0.008 | 2.55E-10 |  | C | T | -0.001 | 0.008 | 0.850 |
| Insomnia | rs4238755 | A | -0.043 | 0.007 | 2.30E-10 |  | A | C | -0.006 | 0.007 | 0.440 |
| Insomnia | rs429358 | T | 0.046 | 0.008 | 2.13E-08 |  | T | C | -0.005 | 0.009 | 0.600 |
| Insomnia | rs4588900 | A | 0.033 | 0.006 | 1.57E-08 |  | G | A | -0.027 | 0.007 | 0.000 |
| Insomnia | rs4592425 | T | 0.040 | 0.006 | 4.31E-10 |  | G | T | 0.002 | 0.007 | 0.720 |
| Insomnia | rs4643373 | T | 0.041 | 0.007 | 1.58E-10 |  | T | C | 0.011 | 0.007 | 0.098 |
| Insomnia | rs4702 | A | -0.048 | 0.006 | 6.78E-16 |  | G | A | -0.014 | 0.007 | 0.032 |
| Insomnia | rs4709655 | T | -0.054 | 0.009 | 3.09E-09 |  | C | T | -0.004 | 0.010 | 0.700 |
| Insomnia | rs4767645 | T | -0.037 | 0.006 | 6.47E-10 |  | G | T | 0.010 | 0.007 | 0.120 |
| Insomnia | rs4788203 | A | -0.035 | 0.006 | 6.32E-09 |  | G | A | -0.001 | 0.007 | 0.860 |
| Insomnia | rs4858708 | A | -0.034 | 0.006 | 1.23E-08 |  | A | T | -0.009 | 0.007 | 0.170 |
| Insomnia | rs4981170 | A | -0.054 | 0.008 | 7.33E-13 |  | A | G | 0.002 | 0.008 | 0.840 |
| Insomnia | rs521484 | A | -0.040 | 0.007 | 1.53E-08 |  | G | A | 0.009 | 0.008 | 0.260 |
| Insomnia | rs524859 | A | -0.044 | 0.006 | 1.48E-12 |  | G | A | 0.011 | 0.007 | 0.130 |
| Insomnia | rs55772859 | A | 0.042 | 0.006 | 4.82E-11 |  | C | A | -0.001 | 0.007 | 0.830 |
| Insomnia | rs55972276 | A | 0.073 | 0.009 | 4.19E-17 |  | C | A | -0.013 | 0.009 | 0.210 |
| Insomnia | rs56097173 | T | 0.040 | 0.006 | 2.69E-10 |  | T | C | -0.012 | 0.007 | 0.079 |
| Insomnia | rs56133505 | A | 0.041 | 0.006 | 5.59E-12 |  | G | A | -0.012 | 0.007 | 0.077 |
| Insomnia | rs566673 | T | -0.039 | 0.006 | 1.18E-10 |  | T | G | -0.012 | 0.007 | 0.063 |
| Insomnia | rs5877 | T | 0.036 | 0.006 | 1.23E-08 |  | T | C | -0.007 | 0.007 | 0.390 |
| Insomnia | rs6019663 | T | 0.040 | 0.007 | 6.47E-10 |  | T | C | -0.013 | 0.007 | 0.070 |
| Insomnia | rs60565673 | T | -0.043 | 0.006 | 1.59E-12 |  | T | G | -0.009 | 0.007 | 0.160 |
| Insomnia | rs6119267 | C | -0.060 | 0.006 | 2.32E-20 |  | C | G | -0.014 | 0.007 | 0.059 |
| Insomnia | rs61921611 | T | -0.044 | 0.006 | 7.84E-12 |  | T | C | 0.004 | 0.007 | 0.580 |
| Insomnia | rs62068188 | T | 0.049 | 0.008 | 1.18E-09 |  | T | C | -0.006 | 0.009 | 0.500 |
| Insomnia | rs62158170 | A | 0.066 | 0.007 | 1.20E-19 |  | A | G | -0.009 | 0.008 | 0.200 |
| Insomnia | rs62213452 | T | 0.037 | 0.007 | 2.39E-08 |  | G | T | 0.003 | 0.007 | 0.650 |
| Insomnia | rs62264767 | A | 0.065 | 0.008 | 1.63E-14 |  | A | C | 0.008 | 0.009 | 0.350 |
| Insomnia | rs62301574 | C | -0.042 | 0.007 | 1.37E-08 |  | G | C | 0.003 | 0.008 | 0.820 |
| Insomnia | rs623025 | T | -0.038 | 0.007 | 3.16E-08 |  | T | C | -0.006 | 0.008 | 0.450 |
| Insomnia | rs6457796 | T | -0.039 | 0.007 | 1.12E-08 |  | T | C | -0.025 | 0.007 | 0.001 |
| Insomnia | rs6510033 | A | -0.037 | 0.007 | 4.66E-08 |  | A | G | -0.002 | 0.007 | 0.750 |
| Insomnia | rs6545798 | A | -0.041 | 0.006 | 1.19E-11 |  | A | T | -0.002 | 0.007 | 0.790 |
| Insomnia | rs6562066 | T | 0.039 | 0.006 | 1.38E-10 |  | T | C | 0.009 | 0.007 | 0.190 |
| Insomnia | rs6597649 | T | 0.033 | 0.006 | 3.05E-08 |  | C | T | 0.002 | 0.007 | 0.770 |
| Insomnia | rs6601080 | A | 0.035 | 0.006 | 2.21E-08 |  | G | A | -0.002 | 0.007 | 0.840 |
| Insomnia | rs6606731 | A | 0.043 | 0.008 | 1.51E-08 |  | T | A | 0.001 | 0.008 | 0.920 |
| Insomnia | rs66674044 | A | -0.060 | 0.009 | 2.18E-12 |  | A | T | -0.010 | 0.009 | 0.280 |
| Insomnia | rs667730 | T | 0.033 | 0.006 | 2.26E-08 |  | T | C | -0.004 | 0.007 | 0.550 |
| Insomnia | rs6702604 | A | -0.037 | 0.006 | 1.30E-09 |  | A | G | -0.003 | 0.007 | 0.660 |
| Insomnia | rs670501 | T | 0.053 | 0.007 | 7.40E-13 |  | T | C | -0.003 | 0.008 | 0.670 |
| Insomnia | rs671985 | A | -0.038 | 0.006 | 2.79E-10 |  | G | A | 0.014 | 0.007 | 0.023 |
| Insomnia | rs6756610 | C | 0.037 | 0.006 | 1.14E-09 |  | C | G | -0.008 | 0.007 | 0.210 |
| Insomnia | rs6808140 | T | 0.039 | 0.006 | 5.35E-11 |  | C | T | -0.007 | 0.007 | 0.300 |
| Insomnia | rs6888135 | A | 0.038 | 0.006 | 1.21E-10 |  | C | A | -0.005 | 0.007 | 0.400 |
| Insomnia | rs694786 | T | -0.044 | 0.006 | 1.97E-13 |  | T | C | -0.010 | 0.007 | 0.140 |
| Insomnia | rs6967168 | T | -0.044 | 0.007 | 1.39E-10 |  | T | G | -0.004 | 0.008 | 0.630 |
| Insomnia | rs6978112 | T | 0.034 | 0.006 | 2.11E-08 |  | C | T | 0.008 | 0.007 | 0.250 |
| Insomnia | rs701394 | A | -0.036 | 0.006 | 6.83E-09 |  | A | G | -0.019 | 0.007 | 0.004 |
| Insomnia | rs7040224 | A | 0.037 | 0.006 | 4.24E-09 |  | A | G | -0.005 | 0.007 | 0.410 |
| Insomnia | rs7044885 | C | -0.041 | 0.006 | 5.67E-12 |  | C | G | -0.007 | 0.007 | 0.250 |
| Insomnia | rs715338 | A | 0.041 | 0.006 | 7.85E-12 |  | G | A | 0.003 | 0.007 | 0.710 |
| Insomnia | rs7168238 | C | 0.064 | 0.011 | 1.80E-08 |  | C | G | -0.010 | 0.013 | 0.440 |
| Insomnia | rs7214267 | A | -0.044 | 0.006 | 5.09E-13 |  | G | A | -0.017 | 0.007 | 0.013 |
| Insomnia | rs72657797 | T | -0.056 | 0.008 | 1.52E-12 |  | C | T | -0.001 | 0.009 | 0.920 |
| Insomnia | rs72773790 | T | 0.037 | 0.006 | 3.71E-09 |  | T | C | 0.003 | 0.007 | 0.620 |
| Insomnia | rs728017 | A | -0.035 | 0.006 | 9.51E-09 |  | A | G | 0.004 | 0.007 | 0.490 |
| Insomnia | rs72899452 | T | 0.074 | 0.012 | 1.00E-09 |  | C | T | 0.000 | 0.013 | 0.900 |
| Insomnia | rs73671843 | A | -0.056 | 0.009 | 5.49E-10 |  | G | A | 0.012 | 0.010 | 0.240 |
| Insomnia | rs7402939 | T | -0.036 | 0.006 | 5.19E-09 |  | T | C | 0.007 | 0.007 | 0.290 |
| Insomnia | rs742760 | A | 0.043 | 0.008 | 2.48E-08 |  | A | T | -0.001 | 0.008 | 0.870 |
| Insomnia | rs7475916 | C | -0.037 | 0.006 | 6.70E-09 |  | C | G | 0.007 | 0.007 | 0.270 |
| Insomnia | rs75452188 | A | 0.052 | 0.009 | 1.58E-08 |  | A | G | -0.008 | 0.010 | 0.450 |
| Insomnia | rs7571486 | A | -0.039 | 0.007 | 1.40E-08 |  | G | A | -0.008 | 0.008 | 0.310 |
| Insomnia | rs75932578 | T | -0.040 | 0.007 | 4.15E-08 |  | C | T | -0.010 | 0.008 | 0.230 |
| Insomnia | rs7599697 | T | -0.037 | 0.006 | 5.00E-09 |  | C | T | 0.016 | 0.007 | 0.019 |
| Insomnia | rs76145129 | T | -0.050 | 0.009 | 2.73E-08 |  | G | T | 0.005 | 0.010 | 0.600 |
| Insomnia | rs7615602 | C | -0.040 | 0.007 | 2.59E-09 |  | C | G | -0.011 | 0.007 | 0.110 |
| Insomnia | rs7625896 | A | 0.036 | 0.006 | 5.28E-09 |  | A | G | 0.006 | 0.007 | 0.350 |
| Insomnia | rs77641763 | T | 0.071 | 0.009 | 6.53E-15 |  | C | T | -0.007 | 0.010 | 0.490 |
| Insomnia | rs7992992 | A | 0.051 | 0.009 | 1.15E-08 |  | A | G | -0.011 | 0.010 | 0.250 |
| Insomnia | rs8076183 | T | -0.038 | 0.006 | 2.75E-10 |  | C | T | 0.004 | 0.007 | 0.530 |
| Insomnia | rs8180457 | T | -0.056 | 0.008 | 1.12E-11 |  | T | C | -0.016 | 0.009 | 0.054 |
| Insomnia | rs8180817 | C | -0.049 | 0.006 | 1.83E-16 |  | G | C | 0.012 | 0.007 | 0.086 |
| Insomnia | rs823247 | T | -0.037 | 0.006 | 5.25E-10 |  | C | T | -0.005 | 0.007 | 0.430 |
| Insomnia | rs830716 | C | 0.045 | 0.007 | 8.68E-12 |  | G | C | -0.002 | 0.007 | 0.730 |
| Insomnia | rs871994 | A | 0.035 | 0.006 | 5.50E-09 |  | C | A | 0.001 | 0.007 | 0.800 |
| Insomnia | rs874168 | T | 0.034 | 0.006 | 7.95E-09 |  | T | C | -0.004 | 0.007 | 0.570 |
| Insomnia | rs908668 | T | 0.050 | 0.007 | 1.41E-11 |  | C | T | -0.014 | 0.008 | 0.075 |
| Insomnia | rs910187 | A | -0.035 | 0.006 | 1.63E-08 |  | G | A | 0.004 | 0.007 | 0.440 |
| Insomnia | rs9373590 | A | 0.040 | 0.006 | 2.18E-11 |  | A | T | -0.010 | 0.007 | 0.120 |
| Insomnia | rs9394502 | T | -0.054 | 0.006 | 7.76E-18 |  | C | T | -0.010 | 0.007 | 0.170 |
| Insomnia | rs9527083 | A | -0.076 | 0.006 | 1.61E-32 |  | G | A | 0.000 | 0.007 | 0.900 |
| Insomnia | rs9540729 | A | 0.036 | 0.006 | 1.40E-09 |  | A | T | 0.008 | 0.007 | 0.280 |
| Insomnia | rs9563886 | T | -0.034 | 0.006 | 3.08E-08 |  | T | C | 0.002 | 0.007 | 0.720 |
| Insomnia | rs9889282 | A | -0.042 | 0.006 | 4.70E-12 |  | A | C | 0.000 | 0.007 | 0.920 |
| Insomnia | rs9931543 | T | 0.048 | 0.007 | 1.11E-12 |  | T | C | -0.007 | 0.007 | 0.400 |
| Insomnia | rs9964420 | A | 0.035 | 0.007 | 4.54E-08 |  | C | A | 0.001 | 0.007 | 0.920 |
| Sleep duration | rs10173260 | C | 0.770 | 0.139 | 2.90E-08 |  | T | C | -0.003 | 0.007 | 0.510 |
| Sleep duration | rs10421649 | A | 0.798 | 0.138 | 6.90E-09 |  | T | A | 0.002 | 0.007 | 0.770 |
| Sleep duration | rs10483350 | G | 1.042 | 0.172 | 1.50E-09 |  | A | G | 0.015 | 0.008 | 0.055 |
| Sleep duration | rs1057703 | G | 1.164 | 0.192 | 1.10E-09 |  | T | G | 0.004 | 0.009 | 0.700 |
| Sleep duration | rs10761674 | C | 0.740 | 0.136 | 4.20E-08 |  | C | T | 0.000 | 0.007 | 0.940 |
| Sleep duration | rs10973207 | T | 1.226 | 0.187 | 6.00E-11 |  | G | T | 0.008 | 0.009 | 0.400 |
| Sleep duration | rs112230981 | A | 1.892 | 0.314 | 2.20E-09 |  | A | G | 0.018 | 0.015 | 0.240 |
| Sleep duration | rs113113059 | T | 0.968 | 0.164 | 8.40E-09 |  | T | C | -0.012 | 0.008 | 0.120 |
| Sleep duration | rs11567976 | T | 0.768 | 0.137 | 2.10E-08 |  | C | T | 0.019 | 0.007 | 0.003 |
| Sleep duration | rs11602180 | C | 1.095 | 0.184 | 2.30E-09 |  | C | T | -0.010 | 0.009 | 0.250 |
| Sleep duration | rs11621908 | C | 1.446 | 0.250 | 5.60E-09 |  | C | T | -0.031 | 0.012 | 0.011 |
| Sleep duration | rs11643715 | G | 0.834 | 0.150 | 3.20E-08 |  | C | G | 0.005 | 0.007 | 0.480 |
| Sleep duration | rs11885663 | T | 0.973 | 0.157 | 8.60E-10 |  | C | T | 0.003 | 0.008 | 0.570 |
| Sleep duration | rs12246842 | A | 0.804 | 0.136 | 3.90E-09 |  | A | G | -0.006 | 0.007 | 0.320 |
| Sleep duration | rs12567114 | A | 0.890 | 0.152 | 4.30E-09 |  | G | A | 0.001 | 0.007 | 0.860 |
| Sleep duration | rs12607679 | T | 1.208 | 0.156 | 8.30E-15 |  | T | C | -0.007 | 0.007 | 0.300 |
| Sleep duration | rs12611523 | A | 0.758 | 0.137 | 3.10E-08 |  | A | G | -0.009 | 0.007 | 0.180 |
| Sleep duration | rs1263056 | A | 0.768 | 0.137 | 2.00E-08 |  | A | G | -0.001 | 0.007 | 0.910 |
| Sleep duration | rs13088093 | G | 0.976 | 0.144 | 7.00E-12 |  | T | G | -0.003 | 0.007 | 0.730 |
| Sleep duration | rs13109404 | T | 1.872 | 0.264 | 1.40E-12 |  | T | G | -0.023 | 0.013 | 0.069 |
| Sleep duration | rs151014368 | A | 0.966 | 0.169 | 9.10E-09 |  | G | A | 0.003 | 0.008 | 0.730 |
| Sleep duration | rs1517572 | C | 0.879 | 0.138 | 1.50E-10 |  | A | C | 0.000 | 0.007 | 0.920 |
| Sleep duration | rs1553132 | G | 0.870 | 0.155 | 2.50E-08 |  | A | G | -0.007 | 0.007 | 0.360 |
| Sleep duration | rs17427571 | A | 0.830 | 0.146 | 1.30E-08 |  | A | G | -0.011 | 0.007 | 0.090 |
| Sleep duration | rs174560 | C | 0.815 | 0.146 | 2.80E-08 |  | T | C | 0.028 | 0.007 | 0.000 |
| Sleep duration | rs17732997 | C | 0.776 | 0.137 | 1.20E-08 |  | C | G | -0.005 | 0.007 | 0.450 |
| Sleep duration | rs1776776 | T | 1.198 | 0.205 | 4.90E-09 |  | T | C | -0.005 | 0.010 | 0.610 |
| Sleep duration | rs1939455 | G | 1.226 | 0.214 | 1.20E-08 |  | G | T | 0.001 | 0.010 | 0.950 |
| Sleep duration | rs1991556 | G | 0.994 | 0.163 | 1.00E-09 |  | G | A | -0.037 | 0.008 | 0.000 |
| Sleep duration | rs205024 | T | 0.830 | 0.140 | 3.90E-09 |  | C | T | 0.016 | 0.007 | 0.017 |
| Sleep duration | rs2072727 | T | 0.795 | 0.137 | 7.90E-09 |  | T | C | 0.002 | 0.007 | 0.660 |
| Sleep duration | rs2079070 | C | 1.053 | 0.154 | 7.50E-12 |  | C | G | 0.000 | 0.007 | 0.960 |
| Sleep duration | rs2192528 | A | 0.802 | 0.136 | 2.70E-09 |  | A | G | -0.007 | 0.007 | 0.320 |
| Sleep duration | rs2231265 | G | 0.897 | 0.162 | 2.70E-08 |  | A | G | 0.007 | 0.008 | 0.380 |
| Sleep duration | rs269054 | A | 0.819 | 0.138 | 2.10E-09 |  | T | A | -0.003 | 0.007 | 0.550 |
| Sleep duration | rs3095508 | C | 0.921 | 0.138 | 3.10E-11 |  | C | A | 0.000 | 0.007 | 0.880 |
| Sleep duration | rs330088 | C | 0.868 | 0.137 | 2.70E-10 |  | T | C | 0.015 | 0.007 | 0.024 |
| Sleep duration | rs34354917 | C | 0.825 | 0.150 | 3.90E-08 |  | C | A | 0.004 | 0.007 | 0.600 |
| Sleep duration | rs34556183 | A | 1.015 | 0.151 | 2.30E-11 |  | A | G | -0.007 | 0.007 | 0.340 |
| Sleep duration | rs34731055 | T | 1.168 | 0.177 | 3.70E-11 |  | C | T | 0.005 | 0.009 | 0.540 |
| Sleep duration | rs35531607 | C | 0.770 | 0.136 | 1.50E-08 |  | T | C | 0.002 | 0.007 | 0.830 |
| Sleep duration | rs365663 | A | 0.878 | 0.137 | 1.00E-10 |  | A | G | -0.004 | 0.007 | 0.530 |
| Sleep duration | rs374153 | C | 1.057 | 0.186 | 9.10E-09 |  | C | T | 0.010 | 0.009 | 0.260 |
| Sleep duration | rs4128364 | C | 0.876 | 0.143 | 1.40E-09 |  | T | C | -0.007 | 0.007 | 0.320 |
| Sleep duration | rs4538155 | T | 0.779 | 0.142 | 3.60E-08 |  | C | T | 0.001 | 0.007 | 0.930 |
| Sleep duration | rs4592416 | G | 0.881 | 0.136 | 9.30E-11 |  | A | G | -0.008 | 0.007 | 0.200 |
| Sleep duration | rs460692 | C | 1.263 | 0.200 | 3.60E-10 |  | C | T | -0.007 | 0.010 | 0.500 |
| Sleep duration | rs4767550 | G | 0.858 | 0.139 | 6.30E-10 |  | A | G | 0.000 | 0.007 | 0.980 |
| Sleep duration | rs55658675 | C | 0.788 | 0.142 | 2.00E-08 |  | C | T | -0.001 | 0.007 | 0.770 |
| Sleep duration | rs56372231 | T | 1.017 | 0.144 | 2.20E-12 |  | C | T | 0.013 | 0.007 | 0.064 |
| Sleep duration | rs61796569 | T | 0.927 | 0.154 | 1.50E-09 |  | C | T | 0.006 | 0.007 | 0.370 |
| Sleep duration | rs61985058 | T | 1.116 | 0.194 | 1.30E-08 |  | C | T | 0.013 | 0.009 | 0.140 |
| Sleep duration | rs62120041 | T | 1.567 | 0.274 | 9.60E-09 |  | T | C | -0.025 | 0.013 | 0.059 |
| Sleep duration | rs6575005 | T | 0.934 | 0.159 | 4.40E-09 |  | T | C | -0.005 | 0.008 | 0.510 |
| Sleep duration | rs7115226 | A | 1.594 | 0.261 | 1.70E-09 |  | C | A | 0.020 | 0.013 | 0.120 |
| Sleep duration | rs72804080 | G | 1.068 | 0.192 | 2.90E-08 |  | A | G | 0.002 | 0.009 | 0.760 |
| Sleep duration | rs73219758 | G | 0.984 | 0.150 | 5.60E-11 |  | G | A | -0.005 | 0.007 | 0.580 |
| Sleep duration | rs7503199 | C | 0.885 | 0.154 | 1.00E-08 |  | C | T | 0.007 | 0.007 | 0.380 |
| Sleep duration | rs75539574 | C | 2.175 | 0.244 | 6.90E-19 |  | A | C | -0.001 | 0.012 | 0.880 |
| Sleep duration | rs7556815 | A | 2.443 | 0.164 | 1.30E-49 |  | G | A | -0.008 | 0.008 | 0.210 |
| Sleep duration | rs7644809 | T | 0.784 | 0.138 | 1.60E-08 |  | T | C | 0.003 | 0.007 | 0.710 |
| Sleep duration | rs7806045 | T | 0.887 | 0.158 | 1.40E-08 |  | T | C | -0.005 | 0.008 | 0.520 |
| Sleep duration | rs7915425 | T | 1.144 | 0.179 | 2.00E-10 |  | T | C | 0.011 | 0.009 | 0.220 |
| Sleep duration | rs7951019 | G | 2.213 | 0.391 | 1.20E-08 |  | T | G | -0.010 | 0.019 | 0.600 |
| Sleep duration | rs80193650 | G | 1.010 | 0.184 | 4.10E-08 |  | A | G | 0.006 | 0.009 | 0.470 |
| Sleep duration | rs8038326 | A | 0.955 | 0.152 | 2.80E-10 |  | A | G | 0.006 | 0.007 | 0.410 |
| Sleep duration | rs8050478 | G | 0.960 | 0.136 | 1.70E-12 |  | G | A | 0.006 | 0.007 | 0.370 |
| Sleep duration | rs915416 | C | 1.156 | 0.150 | 9.90E-15 |  | C | G | 0.006 | 0.007 | 0.450 |
| Sleep duration | rs9345234 | C | 0.781 | 0.138 | 1.80E-08 |  | A | C | 0.005 | 0.007 | 0.400 |
| Sleep duration | rs9382445 | T | 0.872 | 0.140 | 4.80E-10 |  | T | C | 0.003 | 0.007 | 0.590 |
| Sleep duration | rs9903973 | C | 0.766 | 0.136 | 2.60E-08 |  | C | T | -0.006 | 0.007 | 0.380 |
| Sleep duration | rs9940646 | C | 1.017 | 0.137 | 1.20E-13 |  | C | G | 0.017 | 0.007 | 0.013 |
| Snoring | rs10878269 | C | -0.009 | 0.001 | 2.30E-16 |  | C | T | 0.005 | 0.007 | 0.510 |
| Snoring | rs11018488 | A | 0.007 | 0.001 | 5.30E-10 |  | A | T | -0.003 | 0.007 | 0.690 |
| Snoring | rs12119849 | G | -0.012 | 0.002 | 4.10E-11 |  | G | A | 0.004 | 0.012 | 0.720 |
| Snoring | rs12429765 | A | 0.007 | 0.001 | 6.20E-11 |  | A | G | -0.009 | 0.007 | 0.180 |
| Snoring | rs13251292 | A | -0.007 | 0.001 | 4.30E-12 |  | A | G | -0.001 | 0.007 | 0.940 |
| Snoring | rs145367119 | C | 0.006 | 0.001 | 1.20E-08 |  | G | A | -0.019 | 0.007 | 0.003 |
| Snoring | rs17060460 | A | -0.007 | 0.001 | 1.40E-08 |  | A | G | 0.001 | 0.008 | 0.890 |
| Snoring | rs17151229 | G | -0.007 | 0.001 | 1.90E-09 |  | G | C | 0.008 | 0.007 | 0.260 |
| Snoring | rs180107 | A | -0.007 | 0.001 | 2.10E-10 |  | A | T | 0.006 | 0.007 | 0.350 |
| Snoring | rs2049045 | G | 0.008 | 0.001 | 8.80E-10 |  | G | C | 0.004 | 0.008 | 0.650 |
| Snoring | rs2207944 | T | -0.006 | 0.001 | 2.00E-08 |  | T | C | 0.003 | 0.007 | 0.700 |
| Snoring | rs227727 | A | -0.006 | 0.001 | 1.40E-08 |  | A | T | 0.006 | 0.007 | 0.340 |
| Snoring | rs2307111 | T | 0.008 | 0.001 | 4.80E-13 |  | T | C | -0.004 | 0.007 | 0.510 |
| Snoring | rs2664299 | T | 0.008 | 0.001 | 1.10E-12 |  | T | C | -0.004 | 0.007 | 0.480 |
| Snoring | rs34811474 | G | 0.008 | 0.001 | 1.30E-10 |  | G | A | -0.004 | 0.008 | 0.580 |
| Snoring | rs4744369 | T | -0.006 | 0.001 | 4.00E-08 |  | T | A | -0.006 | 0.007 | 0.370 |
| Snoring | rs4976269 | G | 0.007 | 0.001 | 8.60E-10 |  | G | A | 0.005 | 0.007 | 0.520 |
| Snoring | rs4987719 | C | -0.016 | 0.003 | 3.50E-08 |  | C | T | 0.031 | 0.018 | 0.100 |
| Snoring | rs57222984 | A | -0.008 | 0.001 | 5.40E-12 |  | A | G | -0.036 | 0.008 | 0.000 |
| Snoring | rs592333 | A | -0.009 | 0.001 | 1.00E-17 |  | A | G | 0.002 | 0.007 | 0.790 |
| Snoring | rs6054427 | G | -0.006 | 0.001 | 4.00E-09 |  | G | A | -0.010 | 0.007 | 0.150 |
| Snoring | rs61597598 | G | -0.012 | 0.002 | 5.10E-15 |  | G | A | -0.003 | 0.010 | 0.670 |
| Snoring | rs725861 | A | -0.009 | 0.001 | 1.00E-11 |  | A | G | -0.009 | 0.008 | 0.300 |
| Snoring | rs7829639 | A | -0.007 | 0.001 | 1.40E-10 |  | G | T | 0.002 | 0.007 | 0.830 |
| Snoring | rs80093081 | T | 0.006 | 0.001 | 1.80E-08 |  | C | T | -0.002 | 0.007 | 0.830 |
| Snoring | rs8069947 | C | 0.007 | 0.001 | 2.80E-10 |  | C | T | 0.009 | 0.007 | 0.210 |
| Snoring | rs8108822 | C | 0.011 | 0.002 | 6.20E-10 |  | C | T | -0.004 | 0.011 | 0.710 |
| Snoring | rs947612 | G | 0.007 | 0.001 | 1.50E-08 |  | G | A | 0.008 | 0.008 | 0.280 |
| Snoring | rs9583546 | G | -0.006 | 0.001 | 4.00E-08 |  | G | C | -0.008 | 0.007 | 0.200 |
| Snoring | rs9900496 | T | -0.007 | 0.001 | 1.80E-09 |  | T | C | -0.002 | 0.007 | 0.760 |
| NA means the information on this SNP and its proxy were not available in the summary statistic for fracture.  Abbreviations: Chr, chromosome; SNP, single nucleotide polymorphism. | | | | | | | | | | | |

| **Supplementary Table 4** Detailed information on self-reported codes for five sleep behaviors (chronotype, insomnia, snoring, sleep duration, and excessive daytime sleepiness), the ICD-9 and ICD-10 codes for non-secondary fracture, and the codes for the corresponding diagnosis time in UK Biobank. | | |
| --- | --- | --- |
| Phenotype | Field ID | Code |
| ***Exposure*** |  |  |
| Insomnia | 1200 | \ |
| Sleep duration | 1160 | \ |
| Snoring | 1210 | \ |
| Daytime sleepiness | 1220 | \ |
| Chronotype | 1180 | \ |
| ***Outcome*** |  |  |
| Fracture | 20002 | 1626, 1627, 1628, 1629,1630, 1631, 1632, 1633, 1634, 1635, 1636, 1637, 1638, 1639, 1640, 1644, 1645, 1646, 1647, 1648, 1649,1650, 1651, 1652, 1653, 1654, 1655, 1656 |
|  | 41270 | M484, M4840, M4842, M4844, M4845, M4846, M4847, M4848, M4849; M84, M840, M8400, M8401, M8402, M8403, M8404, M8405, M8406, M8407, M8408, M841, M8410, M8411, M8412, M8413, M8414, M8415, M8416, M8417, M8418, M8419, M842, M8421, M8422, M8423, M8424, M8425, M8426, M8427, M8428, M843, M8430, M8435, M8436, M8437, M8438, M8439, S02, S020, S0200, S0201, S021, S0210, S0211, S022, S0220, S0211, S023, S0230, S0231, S024, S0240, S0241, S025, S0250, S0251, S026, S0260, S0261, S027, S0270, S0271, S028, S0280, S0281, S029, S0290, S0291, S12, S120, S1200, S121, S1210, S122, S1220, S127, S1270, S128, S1280, S1281, S129, S1290, S1291, S22, S220, S2200, S221, S2210, S222, S2220, S223, S2230, S2231, S224, S2241, S225, S2250, S2251, S228, S2280, S229, S2290, S32, S320, S3200, S321, S3210, S3211, S322, S3220, S323, S3230, S3231, S324, S3240, S3241, S325, S3250, S3251, S327, S3270, S3271, S328, S3280, S3281, S42, S420, S4200, S4201, S421, S4210, S422, S4220, S4221, S423, S4230, S4231, S424, S4240, S4241, S427, S4270, S4271, S428, S4280, S429, S4290, S52, S520, S5200, S5201, S521, S5210, S5211, S522, S5220, S5221, S523, S5230, S5231, S524, S5240, S5241, S525, S5250, S5251, S526, S5260, S5261, S527, S5270, S5271, S528, S5280, S5281, S529, S5290, S62, S620, S6200, S621, S6210, S6211, S622, S6220, S6221, S623, S6230, S6231, S624, S6240, S6241, S625, S6250, S6251, S626, S6261, S627, S6270, S6271, S628, S6280, S6281, S72, S720, S7200, S7201, S721, S7210, S7211, S722, S7220, S7221, S723, S72230, S7231, S724, S7240, S7241, S727, S7270, S728, S7280, S729, S7290, S7291, S82, S820, S8200, S8201, S821, S8210, S8211, S822, S8220, S8221, S823, S8231, S824, S8240, S8241, S825, S8250, S8251, S826, S8260, S8261, S827, S8270, S8271, S828, S8280, S8281, S8286, S829, S8290, S8291, S92, S920, S9200, S9201, S921, S9210, S9211, S922, S9220, S9221, S923, S9230, S9231, S924, S9240, S9241, S925, S9250, S9251, S927, S9270, S9271, S929, S9290, S9291; T02, T020, T0200, T021, T0210, T022, T0220, T023, T0230, T0231, T024, T0240, T0241, T025, T0250, T0251, T026, T0260, T027, T0270, T028, T0280, T029, T0290; T08, T08X0, T10, T10X0, T12, T142, T1420; T902, T911, T912, T921, T922, T931, T932, X5909, Z544 |
|  | 41203 | 7338, 73381, 73382, 73383, 73384, 73385, 73386, 73387, 73388, 73389; 800, 8000, 8001, 8002, 8003, 801, 8010, 8011, 802, 8020, 8022, 8023, 8024, 8026, 8028, 803, 8030, 8031; 805, 8050, 8052, 8054, 8056, 8058; 806, 8064, 807, 8070, 8072, 8074, 808, 8080, 8082, 8084, 8088, 8089, 809, 8090, 8091;810, 8100, 811, 8110, 812, 8120, 8121, 8122, 8123, 8124, 8125, 813, 8130, 8131, 8132, 8134, 8135, 814,8140, 8141, 815, 8150, 8151, 816, 8160, 8161, 817, 8170; 820, 8200, 8202, 8208, 8210, 8211, 8212; 822, 8220, 8221; 823, 8230, 8231, 8232, 8233, 8240, 8241, 8242, 8244, 8245, 8246, 8247, 8248, 8249, 825, 8250, 8252, 8253, 826, 8260, 8261, 828, 8280, 829, 8290; 905, 9050, 9052, 9053, 9054 |
| Year when non-cancer illness first diagnosed | 20008 | \ |
| Date of first in-patient diagnosis based on ICD-9 | 41263 | \ |
| Date of first in-patient diagnosis based on ICD-10 | 41280 | \ |

| **Supplementary Table 5** Detailed information on the definition and self-reported UK Biobank field codes for covariates which were adjusted in observational studies. | | | |
| --- | --- | --- | --- |
| Covariates | Source and definition | Field ID | |
| Age | UK Biobank questionnaire at baseline. | | 21003 |
| Alcohol consumption | UK Biobank questionnaire at baseline; the status of alcohol consumption was categorized as never, previous, or current. | | 20117 |
| Body mass index | Physical measurement at baseline. | | 21001 |
| Bone mineral density | Physical measurement at baseline; the estimates of bone mineral density of the left calcaneus, which were measured by trained staffs using quantitative ultrasound. | | 4105 |
| Education | UK Biobank questionnaire at baseline; the status of education was categorized as having a degree, or not. | | 6138 |
| Falls | UK Biobank questionnaire at baseline; the status of falls was categorized as having more than one fall, only one fall, or not in the last year. | | 2296 |
| Sex | UK Biobank questionnaire at baseline; the status of sex was categorized as male, or female. | | 31 |
| Smoking | UK Biobank questionnaire at baseline; the status of smoking was categorized as never, previous, or current smoking. | | 20116 |
| Physical activity | UK Biobank questionnaire at baseline; participants who have physical activity were defined as those who have more than 150 minutes moderate activity per week, or more than 75 minutes vigorous activity per week, or moderate physical activity at least 5 days a week, or vigorous activity once a week. | | 884, 894, 904, 914 |
| The use of glucocorticoid | UK Biobank questionnaire at baseline; the status of this variable was categorized as using one or more than one glucocorticoid, or not. | | 1140874816, 1141167174, 1141174548, 1140874790, 1140882622, 1140882764, 1140882766, 1140882774, 1140882780, 1141179982, 1140868364, 1140874930, 1140874976, 1140883026, 1141157402, 1140874896, 1140876456, 1140878562, 1140879922, 1140879934, 1140882822, 1140882824, 1140882830, 1140882836, 1140882840, 1140882842, 1140882844, 1140882846, 1140882848, 1140882850, 1140882864, 1140882888, 1140882894, 1140882896, 1140882902, 1140882906, 1140882908, 1140882914, 1140882918, 1140884672, 1140884704, 1140888134, 1140910424, 1140910634, 1141157294, 1141173346, 1141181062, 1141181610, 1141189464, 1141194840 |

| **Supplementary table 6** Baseline characteristics of participants who had and had not developed a fracture in prospective studies of fracture. | | | |
| --- | --- | --- | --- |
| Characteristic | Participants without fracture | Participants with fracture | *P*-value |
| (N = 403848) | (N = 14005) |
| Age | 56.54 (8.04)# | 58.38 (7.71)# | < 2×10-16 |
| Sex |  |  | < 2×10-16 |
| Female | 219058 (54.2)* | 8948 (63.9)* |  |
| Male | 184790 (45.8)* | 5057 (36.1)* |  |
| Education |  |  | < 2×10-16 |
| No | 64898 (16.1)* | 2747 (19.6)* |  |
| Yes | 338950 (83.9)* | 11258 (80.4)* |  |
| Body mass index | 27.33 (4.73)# | 27.14 (4.88)# | 4.86×10-6 |
| Smoking |  |  | 2.27×10-10 |
| Never | 219808 (54.4)* | 7353 (52.5)* |  |
| Previous | 143566 (35.5)* | 5023 (35.9)* |  |
| Current | 40474 (10.0)* | 1629 (11.6)* |  |
| Alcohol consumption |  |  | 1.37×10-13 |
| Never | 12409 (3.1)* | 546 (3.9)* |  |
| Previous | 13291 (3.3)* | 572 (4.1)* |  |
| Current | 378148 (93.6)* | 12887 (92.0)* |  |
| Adequate physical activity |  |  | 2.18×10-9 |
| No | 243522 (60.3)* | 8092 (57.8)* |  |
| Yes | 160326 (39.7)* | 5913 (42.2)* |  |
| The use of glucocorticoid |  |  | 0.391 |
| No | 355949 (88.1) * | 122310 (87.9) * |  |
| Yes | 47899 (11.9) * | 1695 (12.1) * |  |
| *Values are numbers (percentages); | | | |
| #Values are mean (standard deviation); | | | |
| Abbreviations: N, number. | | | |

| **Supplementary Table 7** Assessment of the mediator (i.e., falls) for the association between insomnia and fracture risk*. | | | | |
| --- | --- | --- | --- | --- |
|  | Estimate | 95% CI Lower | 95% CI Upper | *P*-value |
| ACME (control) | 4.72×10-4 | 4.24×10-4 | 0.000 | < 2×10-16 |
| ACME (treated) | 4.93×10-4 | 4.41×10-4 | 0.000 | < 2×10-16 |
| ADE (control) | 0.001 | 0.001 | 0.000 | < 2×10-16 |
| ADE (treated) | 0.001 | 0.001 | 0.000 | < 2×10-16 |
| Total Effect | 0.002 | 0.001 | 0.000 | < 2×10-16 |
| Prop. Mediated (control) | 0.254 | 0.165 | 0.400 | < 2×10-16 |
| Prop. Mediated (treated) | 0.266 | 0.178 | 0.410 | < 2×10-16 |
| ACME (average) | 4.82×10-4 | 4.33×10-4 | 0.000 | < 2×10-16 |
| ADE (average) | 0.001 | 0.001 | 0.000 | < 2×10-16 |
| Prop. Mediated (average) | 0.260 | 0.172 | 0.400 | < 2×10-16 |
| * This mediation analysis was adjused for age, education, sex, smoking, alcohol consumption, physical activity, body mass index, and the use of glucocorticoid. Abbreviations: ACME, average causal mediation effect; ADE, average direct effect; CI, confidence interval. | | | | |

| **Supplementary Table 8** Assessment of the mediator (i.e., bone mineral density) for the association between insomnia and fracture risk*. | | | | |
| --- | --- | --- | --- | --- |
|  | Estimate | 95% CI Lower | 95% CI Upper | *P*-value |
| ACME (control) | 1.99×10-4 | 1.45×10-4 | 0.000 | < 2×10-16 |
| ACME (treated) | 2.11×10-4 | 1.54×10-4 | 0.000 | < 2×10-16 |
| ADE (control) | 0.002 | 0.001 | 0.000 | < 2×10-16 |
| ADE (treated) | 0.002 | 0.001 | 0.000 | < 2×10-16 |
| Total Effect | 0.002 | 0.002 | 0.000 | < 2×10-16 |
| Prop. Mediated (control) | 0.095 | 0.061 | 0.140 | < 2×10-16 |
| Prop. Mediated (treated) | 0.101 | 0.065 | 0.140 | < 2×10-16 |
| ACME (average) | 2.05×10-4 | 1.50×10-4 | 0.000 | < 2×10-16 |
| ADE (average) | 0.002 | 0.001 | 0.000 | < 2×10-16 |
| Prop. Mediated (average) | 0.100 | 0.063 | 0.140 | < 2×10-16 |
| * This mediation analysis was adjused for age, education, sex, smoking, alcohol consumption, physical activity, body mass index, and the use of glucocorticoid. Abbreviations: ACME, average causal mediation effect; ADE, average direct effect; CI, confidence interval. | | | | |

| **Supplementary Table 9** Assessment of the mediator (i.e., falls) for the association between sleep duration and fracture risk*. | | | | |
| --- | --- | --- | --- | --- |
|  | Estimate | 95% CI Lower | 95% CI Upper | *P*-value |
| ACME (control) | -2.73×10-4 | -3.43×10-4 | 0.000 | < 2×10-16 |
| ACME (treated) | -2.66×10-4 | -3.31×10-4 | 0.000 | < 2×10-16 |
| ADE (control) | -0.001 | -0.002 | 0.000 | < 2×10-16 |
| ADE (treated) | -0.001 | -0.002 | 0.000 | < 2×10-16 |
| Total Effect | -0.001 | -0.002 | 0.000 | < 2×10-16 |
| Prop. Mediated (control) | 0.205 | 0.143 | 0.360 | < 2×10-16 |
| Prop. Mediated (treated) | 0.200 | 0.139 | 0.360 | < 2×10-16 |
| ACME (average) | -2.69×10-4 | -3.37×10-4 | 0.000 | < 2×10-16 |
| ADE (average) | -0.001 | -0.002 | 0.000 | < 2×10-16 |
| Prop. Mediated (average) | 0.202 | 0.141 | 0.360 | < 2×10-16 |
| * This mediation analysis was adjused for age, education, sex, smoking, alcohol consumption, physical activity, body mass index, and the use of glucocorticoid. Abbreviations: ACME, average causal mediation effect; ADE, average direct effect; CI, confidence interval. | | | | |

| **Supplementary Table 10** Assessment of the mediator (i.e., bone mineral density) for the association between sleep duration and fracture risk*. | | | | |
| --- | --- | --- | --- | --- |
|  | Estimate | 95% CI Lower | 95% CI Upper | *P*-value |
| ACME (control) | -1.73×10-4 | -2.17×10-4 | 0.000 | < 2×10-16 |
| ACME (treated) | -1.69×10-4 | -2.11×10-4 | 0.000 | < 2×10-16 |
| ADE (control) | -0.001 | -0.002 | 0.000 | < 2×10-16 |
| ADE (treated) | -0.001 | -0.002 | 0.000 | < 2×10-16 |
| Total Effect | -0.001 | -0.002 | 0.000 | < 2×10-16 |
| Prop. Mediated (control) | 0.131 | 0.077 | 0.200 | < 2×10-16 |
| Prop. Mediated (treated) | 0.131 | 0.074 | 0.190 | < 2×10-16 |
| ACME (average) | -1.71×10-4 | -2.14×10-4 | 0.000 | < 2×10-16 |
| ADE (average) | -0.001 | -0.002 | 0.000 | < 2×10-16 |
| Prop. Mediated (average) | 0.129 | 0.075 | 0.200 | < 2×10-16 |
| * This mediation analysis was adjused for age, education, sex, smoking, alcohol consumption, physical activity, body mass index, and the use of glucocorticoid. Abbreviations: ACME, average causal mediation effect; ADE, average direct effect; CI, confidence interval. | | | | |

| **Supplementary Table 11** Association of sleep duration with fracture risk in male and female in observational analyses. | | | |
| --- | --- | --- | --- |
| Method | OR/HR | 95% CI | *P-*value of |
| association |
| Multivariable Cox regression in male (model 0) |  |  |  |
| sleep 7-8 hours | 1 (reference) | 1 (reference) | \ |
| sleep less 7 hours | 1.201 | 1.126-1.280 | 1.95×10-8 |
| sleep more than 8 hours | 1.245 | 1.124-1.379 | 2.85×10-5 |
| Multivariable Cox regression in male (model 1) |  |  |  |
| sleep 7-8 hours | 1 (reference) | 1 (reference) | \ |
| sleep less 7 hours | 1.181 | 1.107-1.260 | 4.11×10-7 |
| sleep more than 8 hours | 1.213 | 1.093-1.345 | 2.78×10-4 |
| Multivariable Cox regression in male (model 2) |  |  |  |
| sleep 7-8 hours | 1 (reference) | 1 (reference) | \ |
| sleep less 7 hours | 1.159 | 1.087-1.236 | 6.27×10-6 |
| sleep more than 8 hours | 1.193 | 1.076-1.322 | 7.85×10-4 |
| Multivariable Cox regression in male (model 3) |  |  |  |
| sleep 7-8 hours | 1 (reference) | 1 (reference) | \ |
| sleep less 7 hours | 1.142 | 1.070-1.218 | 6.16×10-5 |
| sleep more than 8 hours | 1.161 | 1.046-1.289 | 0.005 |
| Multivariable Cox regression in female (model 0) |  |  |  |
| sleep 7-8 hours | 1 (reference) | 1 (reference) | \ |
| sleep less 7 hours | 1.123 | 1.070-1.179 | 2.72×10-6 |
| sleep more than 8 hours | 1.103 | 1.023-1.190 | 0.011 |
| Multivariable Cox regression in female (model 1) |  |  |  |
| sleep 7-8 hours | 1 (reference) | 1 (reference) | \ |
| sleep less 7 hours | 1.114 | 1.061-1.170 | 1.61×10-5 |
| sleep more than 8 hours | 1.097 | 1.017-1.184 | 0.017 |
| Multivariable Cox regression in female (model 2) |  |  |  |
| sleep 7-8 hours | 1 (reference) | 1 (reference) | \ |
| sleep less 7 hours | 1.094 | 1.042-1.149 | 3.12×10-4 |
| sleep more than 8 hours | 1.082 | 1.003-1.167 | 0.428 |
| Multivariable Cox regression in female (model 3) |  |  |  |
| sleep 7-8 hours | 1 (reference) | 1 (reference) | \ |
| sleep less 7 hours | 1.087 | 1.035-1.142 | 9.29×10-4 |
| sleep more than 8 hours | 1.075 | 0.996-1.161 | 0.063 |
| Model 1 was adjusted for confounders, including age, education, sex, smoking, alcohol consumption, physical activity, body mass index, and the use of glucocorticoid; Model 1 = Model 0 + BMD; Model 2 = Model 0 +falls; Model 3 = Model 0+ BMD + falls. * the *P*-value of the intercept term. | | | |
| Abbreviations: BMD, bone mineral density; CI, confidence interval; HR, hazard ratio; IVW, inverse-variance weighted; MR, Mendelian randomization; MR-PRESSO, MR pleiotropy residual sum and outlier; OR, odds ratio. | | | |

| **Supplementary Table 12** Association of snoring with fracture risk in observational and Mendelian randomization analyses. | | | |
| --- | --- | --- | --- |
| Method | OR/HR | 95% CI | *P*-value of |
| association |
| Observational study |  |  |  |
| Multivariable Cox regression (model 0) | 0.947 | 0.912-0.984 | 0.005 |
| Multivariable Cox regression (model 1) | 0.937 | 0.902-0.974 | 0.001 |
| Multivariable Cox regression (model 2) | 0.943 | 0.908-0.979 | 0.002 |
| Multivariable Cox regression (model 3) | 0.934 | 0.899-0.970 | 4.47×10-4 |
| One-sample mendelian randomization (model 0) | 1.765 | 0.794-3.921 | 0.163 |
| Two-sample Mendelian randomization |  |  |  |
| IVW method | 1.214 | 0.770-1.913 | 0.402 |
| Weighted-median method | 0.861 | 0.517-1.433 | 0.564 |
| MR-PRESSO Outlier corrected | 1.029 | 0.722-1.466 | 0.875 |
| MR-Egger regression | \ | \ | 0.303* |
| Observational study |  |  |  |
| Multivariable Cox regression in male (model 0) | 0.854 | 0.805-0.906 | 1.33×10-7 |
| Multivariable Cox regression in male (model 1) | 0.847 | 0.798-0.898 | 3.61×10-8 |
| Multivariable Cox regression in male (model 2) | 0.858 | 0.809-0.910 | 2.98×10-7 |
| Multivariable Cox regression in male (model 3) | 0.851 | 0.802-0.903 | 1.02×10-7 |
| Multivariable Cox regression in female (model 0) | 1.020 | 0.971-1.07 | 0.427 |
| Multivariable Cox regression in female (model 1) | 1.007 | 0.958-1.058 | 0.791 |
| Multivariable Cox regression in female (model 2) | 1.010 | 0.962-1.061 | 0.679 |
| Multivariable Cox regression in female (model 3) | 0.998 | 0.950-1.049 | 0.943 |
| Multivariable Cox regression in participants without insomnia (model 0) | 0.908 | 0.839-0.983 | 0.017 |
| Multivariable Cox regression in participants with normal sleep duration (model 0) | 0.905 | 0.865-0.948 | 2.21×10-5 |
| Multivariable Cox regression in participants with non-insomnia | 0.953 | 0.868-1.045 | 0.305 |
| and normal sleep duration (model 3) |
| Model 1 was adjusted for confounders, including age, education, sex, smoking, alcohol consumption, physical activity, body mass index, and the use of glucocorticoid; Model 1 = Model 0 + BMD; Model 2 = Model 0 +falls; Model 3 = Model 0+ BMD + falls. | | | |
| * the *P*-value of the intercept term. |  |  |  |
| Abbreviations: BMD, bone mineral density; CI, confidence interval; HR, hazard ratio; IVW, inverse-variance weighted; MR, Mendelian randomization; MR-PRESSO, MR pleiotropy residual sum and outlier; OR, odds ratio. | | | |

| **Supplementary Table 13** Baseline characteristics of participants with snoring and non-snoring. | | |
| --- | --- | --- |
| Baseline characteristics | Snoring | |
| No | Yes |
| Number of participants | 216330 | 127209 |
| Sleep durationa | 7.16 (1.06) | 7.21 (1.06) |
| Chronotypeb |  |  |
| Morning perference | 197985 (91.52) | 115595(90.87) |
| Evening perference | 18345 (8.48) | 11614 (9.13) |
| Insomniab |  |  |
| No | 50558 (23.37) | 33408 (26.26) |
| Yes | 165772 (76.63) | 93801 (73.74) |
| Excessive daytime sleepinessb |  |  |
| No | 172984 (79.96) | 92750 (72.91) |
| Yes | 43346 (20.04) | 34459 (27.09) |
| a values are mean (SD); b values are numbers (percentages). | | |

| **Supplementary Table 14** Association of chronotype and daytime sleepiness with fracture risk in observational and Mendelian randomization analyses. | | | |
| --- | --- | --- | --- |
| Method | OR/HR | 95% CI | *P*-value of |
| association |
| ***Excessive daytime sleepiness and fracture*** |  |  |  |
| Observational study |  |  |  |
| Multivariable Cox regression (model 0) | 1.086 | 1.052-1.122 | 5.70×10-7 |
| Multivariable Cox regression (model 1) | 1.074 | 1.039-1.110 | 1.96×10-5 |
| Multivariable Cox regression (model 2) | 1.049 | 1.015-1.083 | 0.004 |
| Multivariable Cox regression (model 3) | 1.038 | 1.005-1.073 | 0.024 |
| Multivariable Cox regression in male (model 0) | 1.107 | 1.051-1.167 | 1.27×10-4 |
| Multivariable Cox regression in male (model 1) | 1.098 | 1.041-1.157 | 0.001 |
| Multivariable Cox regression in male (model 2) | 1.062 | 1.008-1.119 | 0.025 |
| Multivariable Cox regression in male (model 3) | 1.053 | 0.999-1.110 | 0.056 |
| Multivariable Cox regression in female (model 0) | 1.080 | 1.036-1.125 | 2.74×10-4 |
| Multivariable Cox regression in female (model 1) | 1.065 | 1.021-1.110 | 0.003 |
| Multivariable Cox regression in female (model 2) | 1.047 | 1.004-1.091 | 0.030 |
| Multivariable Cox regression in female (model 3) | 1.034 | 0.992-1.078 | 0.117 |
| ***Chronotype and fracture*** |  |  |  |
| Observational study |  |  |  |
| Multivariable Cox regression (model 0) | 0.963 | 0.945-0.982 | 1.13×10-4 |
| Multivariable Cox regression (model 1) | 0.970 | 0.952-0.989 | 0.002 |
| Multivariable Cox regression (model 2) | 0.966 | 0.948-0.985 | 3.84×10-4 |
| Multivariable Cox regression (model 3) | 0.973 | 0.955-0.992 | 0.005 |
| One-sample Mendelian randomization | 0.983 | 0.921-1.049 | 0.600 |
| Two-sample Mendelian randomization |  |  |  |
| IVW method | 0.986 | 0.954-1.020 | 0.425 |
| Weighted-median method | 1.003 | 0.959-1.049 | 0.910 |
| MR-PRESSO Outlier corrected | 0.996 | 0.965-1.029 | 0.814 |
| MR-Egger regression | \ | \ | 0.623* |
| Observational study |  |  |  |
| Multivariable Cox regression in male (model 0) | 0.961 | 0.931-0.992 | 0.015 |
| Multivariable Cox regression in male (model 1) | 0.966 | 0.935-0.997 | 0.033 |
| Multivariable Cox regression in male (model 2) | 0.964 | 0.933-0.995 | 0.022 |
| Multivariable Cox regression in male (model 3) | 0.968 | 0.938-1.000 | 0.049 |
| Multivariable Cox regression in female (model 0) | 0.969 | 0.946-0.992 | 0.008 |
| Multivariable Cox regression in female (model 1) | 0.976 | 0.953-0.999 | 0.042 |
| Multivariable Cox regression in female (model 2) | 0.971 | 0.949-0.994 | 0.015 |
| Multivariable Cox regression in female (model 3) | 0.979 | 0.956-1.002 | 0.072 |
| Model 1 was adjusted for confounders, including age, education, sex, smoking, alcohol consumption, physical activity, body mass index, and the use of glucocorticoid; Model 1 = Model 0 + BMD; Model 2 = Model 0 +falls; Model 3 = Model 0+ BMD + falls. | | | |
| * the *P*-value of the intercept term. |  |  |  |
| Abbreviations: BMD, bone mineral density; CI, confidence interval; HR, hazard ratio; IVW, inverse-variance weighted; MR, Mendelian randomization; MR-PRESSO, MR pleiotropy residual sum and outlier; OR, odds ratio. | | | |

| **Supplementary Table 15** Assessment of the mediator (i.e., falls) for the association between sleep risk score and fracture risk*. | | | | |
| --- | --- | --- | --- | --- |
|  | Estimate | 95% CI Lower | 95% CI Upper | *P*-value |
| ACME (control) | 4.74×10-4 | 4.09×10-4 | 0.000 | < 2×10-16 |
| ACME (treated) | 0.001 | 4.37×10-4 | 0.000 | < 2×10-16 |
| ADE (control) | 0.002 | 0.002 | 0.000 | < 2×10-16 |
| ADE (treated) | 0.002 | 0.002 | 0.000 | < 2×10-16 |
| Total Effect | 0.003 | 0.002 | 0.000 | < 2×10-16 |
| Prop. Mediated (control) | 0.179 | 0.128 | 0.210 | < 2×10-16 |
| Prop. Mediated (treated) | 0.192 | 0.140 | 0.220 | < 2×10-16 |
| ACME (average) | 4.91×10-4 | 4.23×10-4 | 0.000 | < 2×10-16 |
| ADE (average) | 0.002 | 0.002 | 0.000 | < 2×10-16 |
| Prop. Mediated (average) | 0.190 | 0.134 | 0.220 | < 2×10-16 |
| * This mediation analysis was adjused for age, education, sex, smoking, alcohol consumption, physical activity, body mass index, and the use of glucocorticoid. Abbreviations: ACME, average causal mediation effect; ADE, average direct effect; CI, confidence interval. | | | | |
|  |  |  |  |  |

| **Supplementary Table 16** Assessment of the mediator (i.e., bone mineral density) for the association between sleep risk score and fracture risk*. | | | | |
| --- | --- | --- | --- | --- |
|  | Estimate | 95% CI Lower | 95% CI Upper | *P*-value |
| ACME (control) | 2.93×10-4 | 2.61×10-4 | 0.000 | < 2×10-16 |
| ACME (treated) | 3.15×10-4 | 2.76×10-4 | 0.000 | < 2×10-16 |
| ADE (control) | 0.002 | 0.002 | 0.000 | < 2×10-16 |
| ADE (treated) | 0.002 | 0.002 | 0.000 | < 2×10-16 |
| Total Effect | 0.003 | 0.002 | 0.000 | < 2×10-16 |
| Prop. Mediated (control) | 0.112 | 0.090 | 0.150 | < 2×10-16 |
| Prop. Mediated (treated) | 0.120 | 0.098 | 0.160 | < 2×10-16 |
| ACME (average) | 0.000 | 0.000 | 0.000 | < 2×10-16 |
| ADE (average) | 0.002 | 0.002 | 0.000 | < 2×10-16 |
| Prop. Mediated (average) | 0.116 | 0.094 | 0.150 | < 2×10-16 |
| * This mediation analysis was adjused for age, education, sex, smoking, alcohol consumption, physical activity, body mass index, and the use of glucocorticoid. Abbreviations: ACME, average causal mediation effect; ADE, average direct effect; CI, confidence interval. | | | | |
|  |  |  |  |  |

**
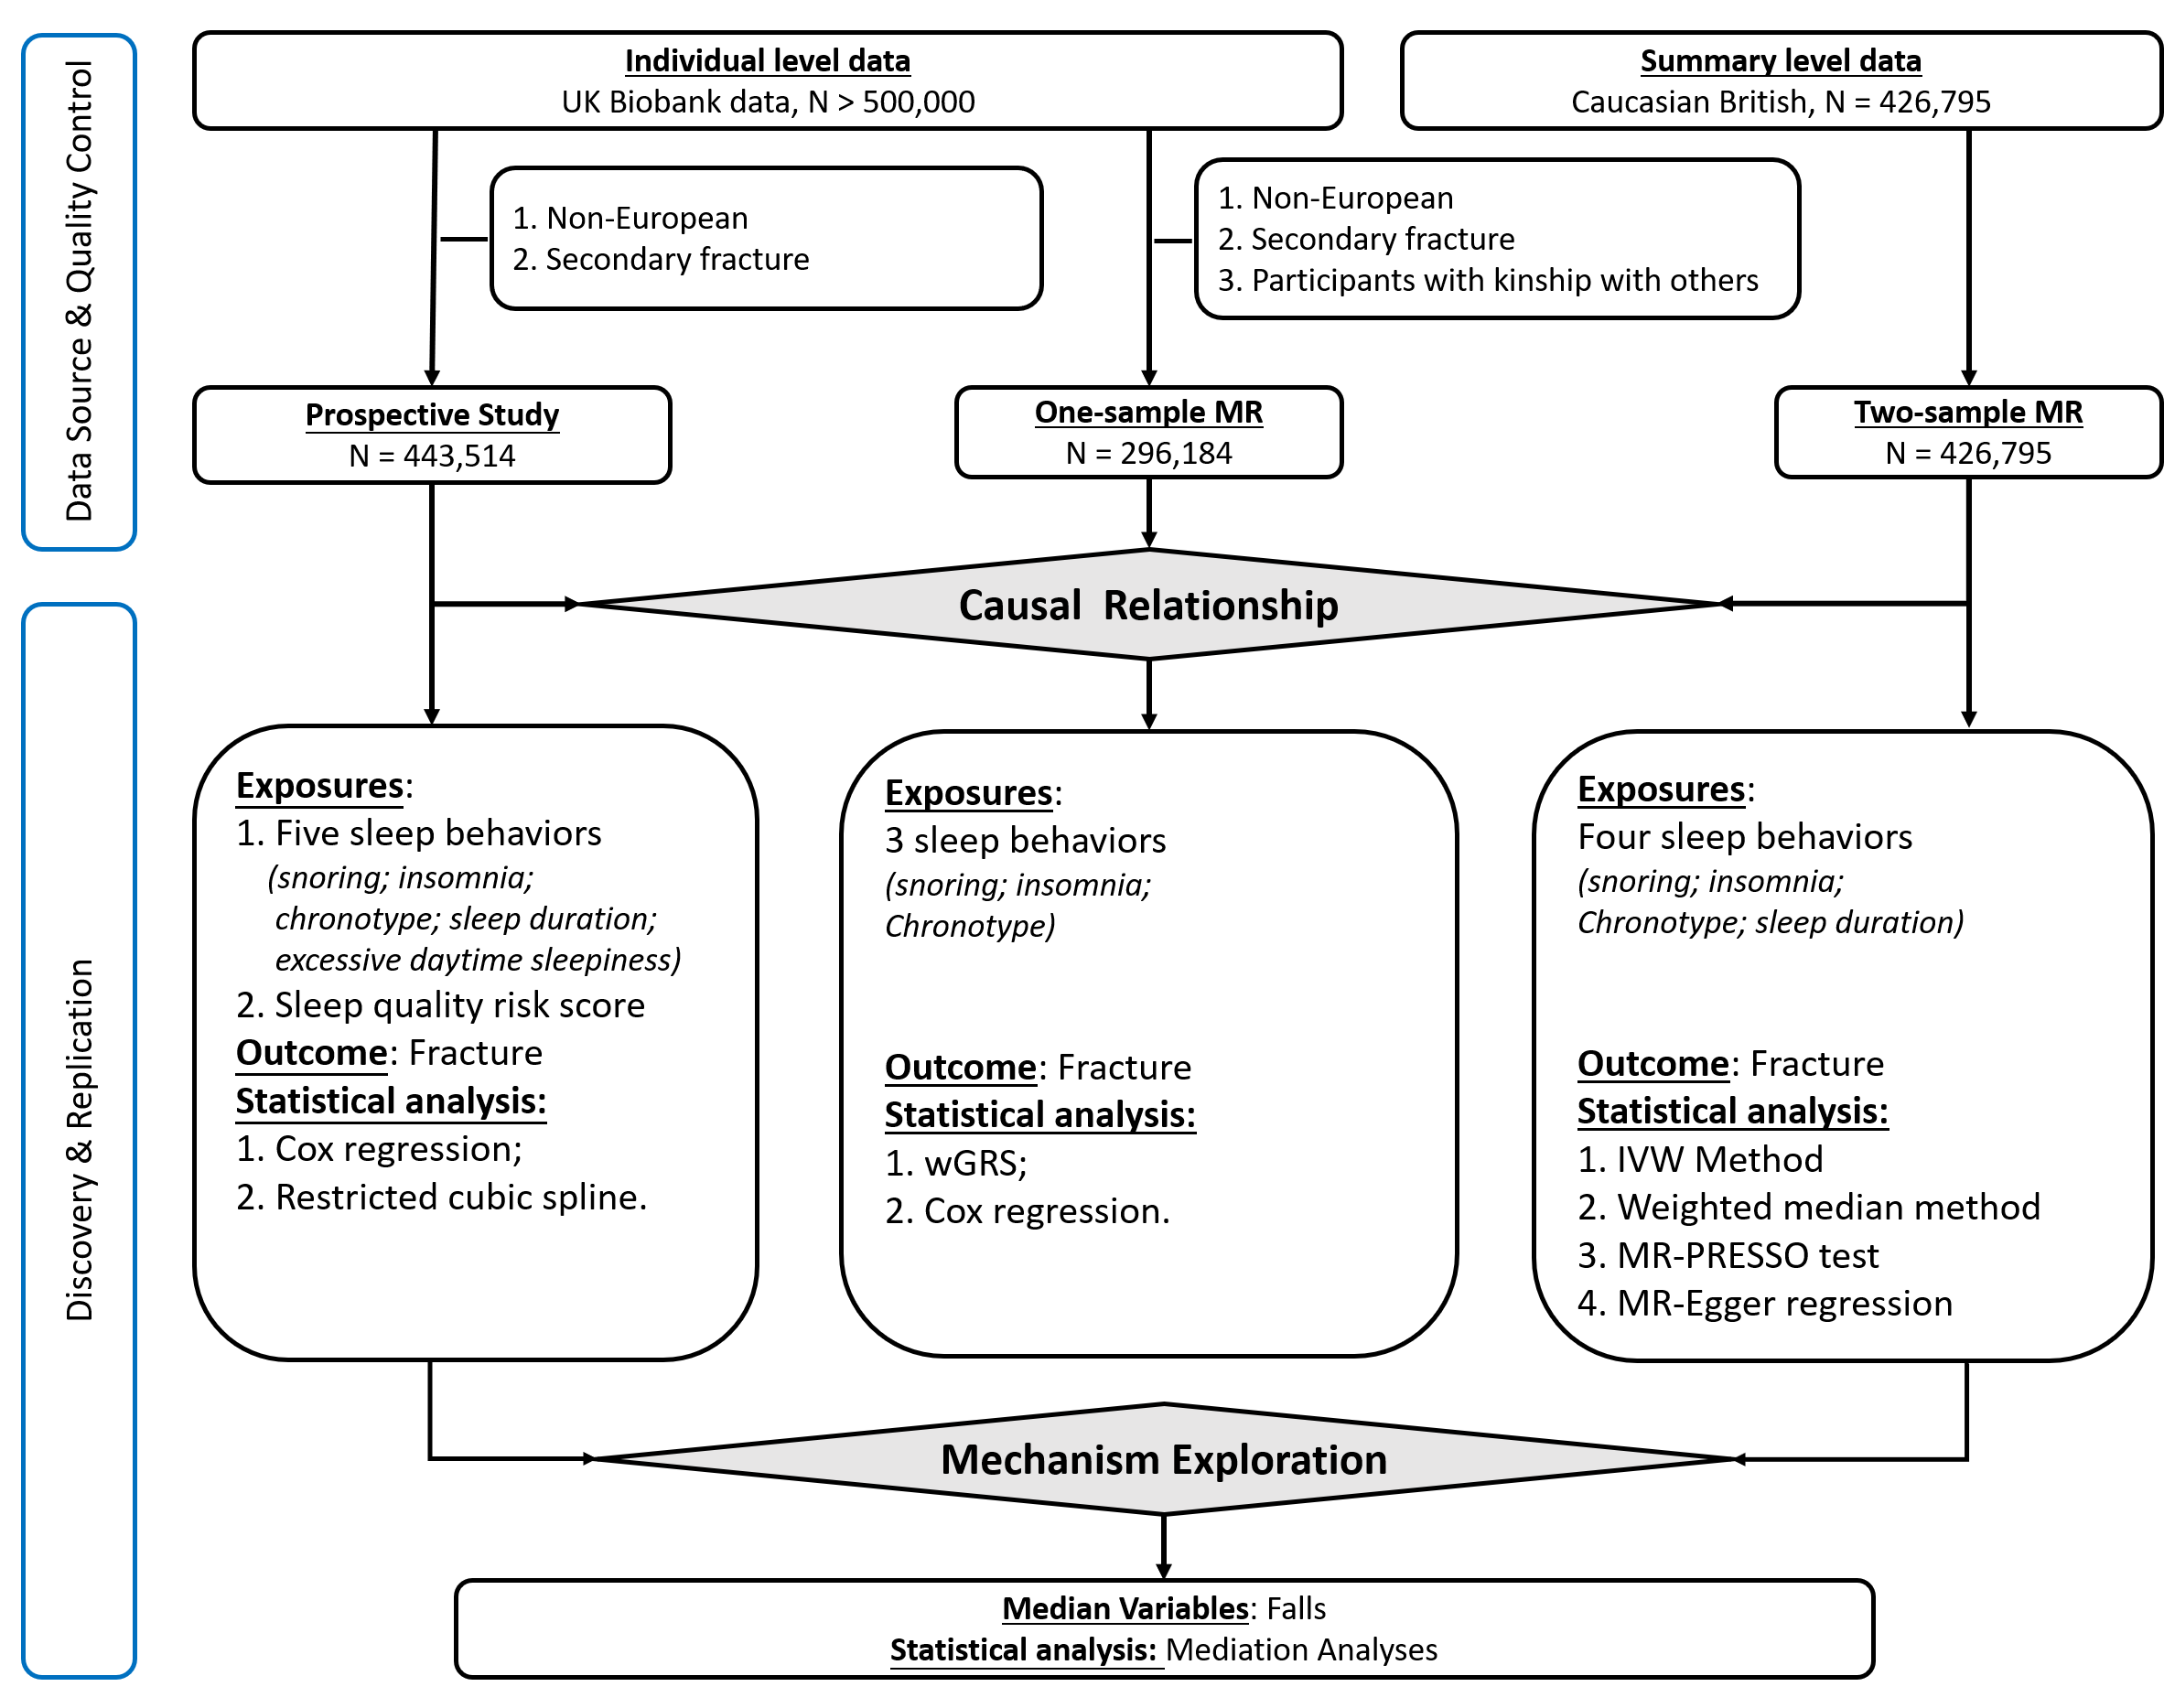
**

**Supplementary Figure 1** An overview of the study design. Abbreviations: IVW, inverse-variance weighted; MR, Mendelian randomization; MR-PRESSO, MR pleiotropy residual sum and outlier; wGRS, weighted genetic risk score.

**
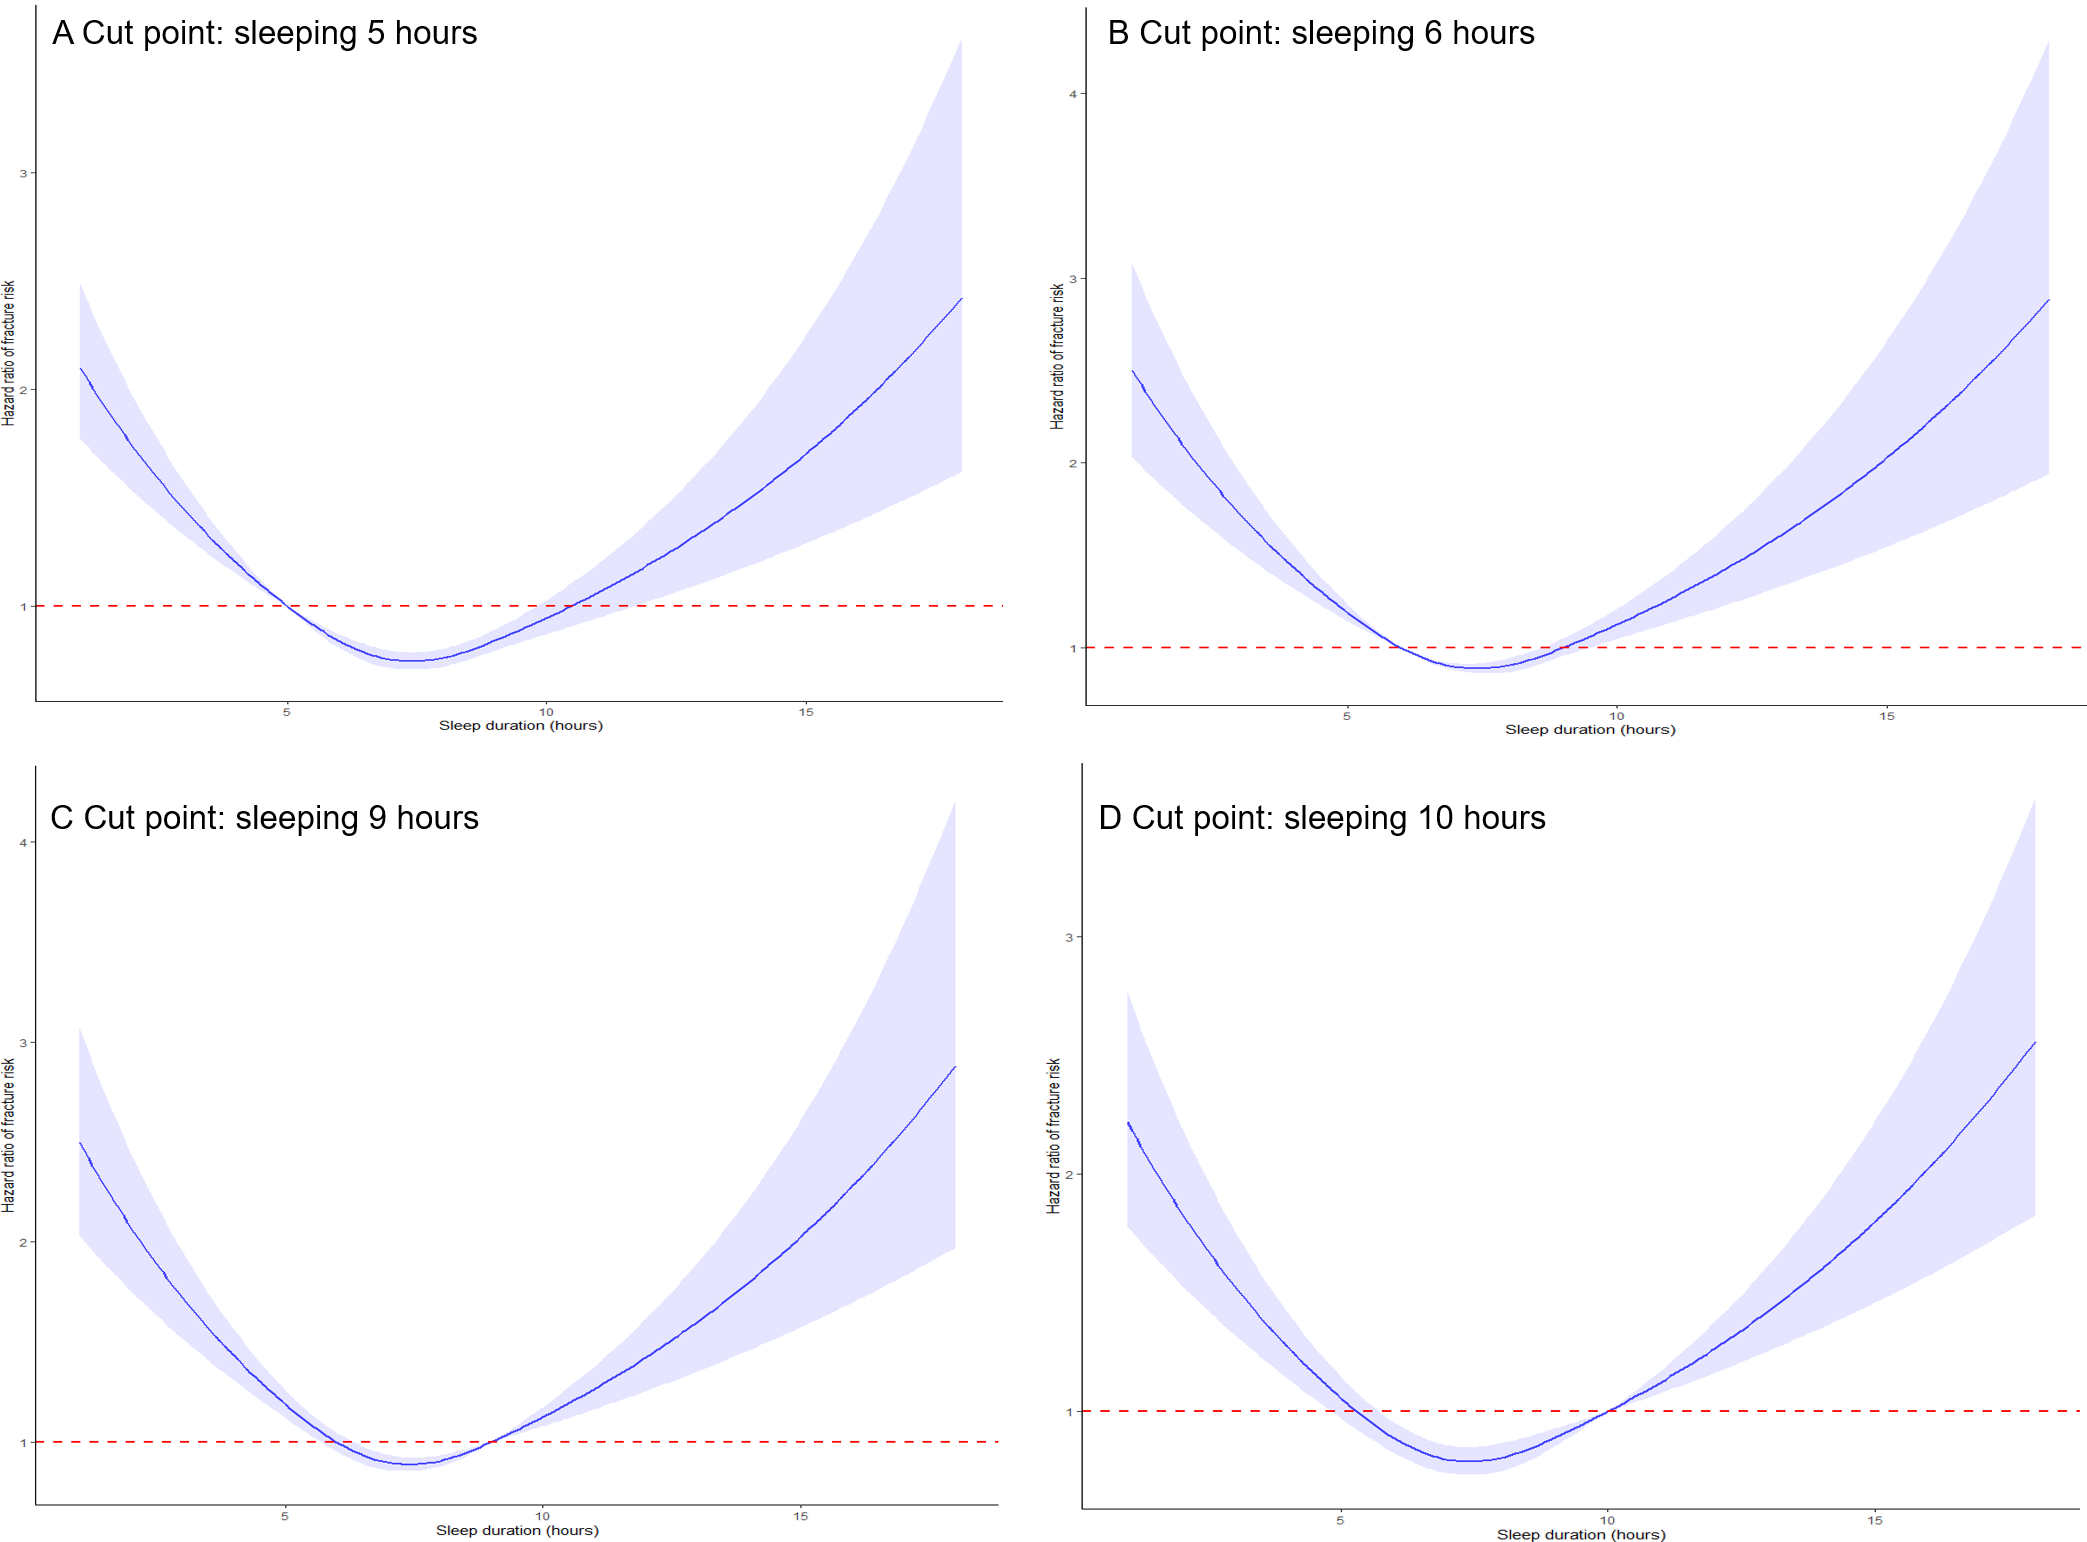
**

**Supplementary Figure 2** Observational association of sleep duration with fracture risk using a restricted cubic spline based on model 0 based on different cut points: (A) sleeping 5 hours per day; (B) sleeping 6 hours per day; (C) sleeping 9 hours per day; and (D) sleeping 10 hours per day. Hazard ratios are indicated by solid lines and the 95% confidence intervals by shaded areas. In all these analyses, models were adjusted for risk factors for fracture, including age, education, sex, smoking, alcohol consumption, physical activity, body mass index, and the use of glucocorticoid.
